# Supplementary material
Source: PubMed Central journal article supplement (PMC4580332)
Supplement: NIHMS41198-supplement-SFig5.pdf [file NIHMS41198-supplement-SFig5.pdf]

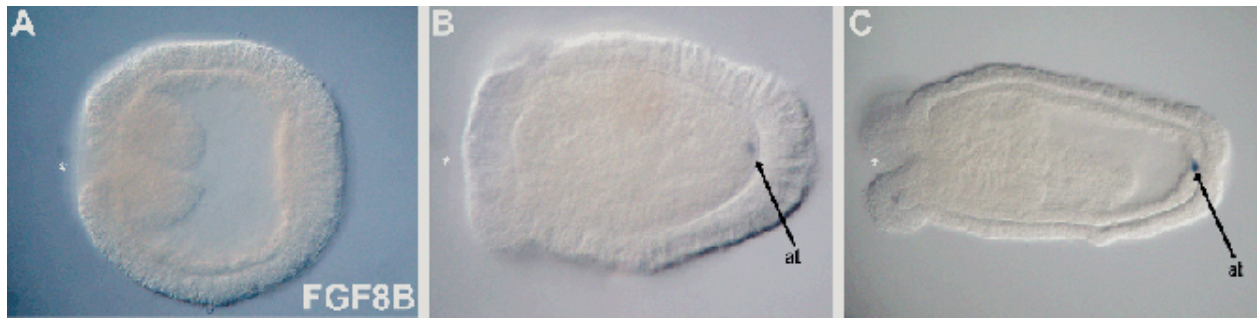

**S5** *NvFGF8B* is expressed exclusively at the aboral end during development. Transcripts for *NvFGF8B* were not detectable during cleavage stages (data not shown) and throughout gastrulation (**a**). During planula (**b**) and polyp (**c**) stages, transcripts were detectable in a few endodermal cells at the aboral end, below the apical tuft. All embryo views are lateral with the *asterisk* denoting the site of gastrulation and future mouth (GIF 92 kb)
