# Supplementary material
Source: PubMed Central journal article supplement (PMC4580332)
Supplement: NIHMS41198-supplement-SFig7.pdf [file NIHMS41198-supplement-SFig7.pdf]

#NEXUS  
[!Created by MacVector on Oct 23 2006 at 11:37:01.]

BEGIN DATA;  
DIMENSIONS NTAX=99 NCHAR=246;  
FORMAT MISSING=X GAP=- INTERLEAVE DATATYPE=PROTEIN;

MATRIX  
NvFGF1D -----YLLRIN--PD----GTVDGTNDPS----- [ 18 ]  
NvFGF8A -----DTFSRPFERVTQLYSRNS-----LDHIRIL--KN----RRVDAKGRDG----- [ 37 ]  
NvFGF1B -----LLSQITQTPSTTRIVKMFRCRVG-----RFLAMN--EN----GTISGTL SQ----- [ 40 ]  
NvFGF1E -----MKVRYSRQGQLYCKNG-----YLIHID--KD----GRISGTTSHK----- [ 34 ]  
Nv247007 --PKRKEKILPPSSFYAVRRLYSEHK-----FVIMID--RK----GAVRGTTDIY----- [ 42 ]  
NvFGF1C --ARFSETLPSLRKYTRKRQLLAKNG-----YYLEIF--PN----GEVGCTRDGS----- [ 42 ]  
NvFGF1A --WRSILSLTKKPTNKVRCITFCRS-----YHLQIL--PT----GLVRGTL DQR----- [ 42 ]  
Nv208072 --PHATRALQNLGIDPQSMAMGSGISVPKIAFLYSSNSGK FVRIHSAHADGAGNRQ----- [ 54 ]  
Nv211797 --KTESHDRMPAHL LARSRRNLHAVSTRKTVILQTKSLWIFEIRLDG SVGGTTNIN----- [ 54 ]  
NvFGF8B --RQRDTIDEKSVLFTRTTTMYSRAS-----GKHLRVLE--N----GEVDGKGERN----- [ 43 ]  
Nv204532 --IQRLRTDPFSLPFYRETQLYSRSS-----RGHLRIFN-RQ----IDAEGKDGDP----- [ 44 ]  
Nv212165 --FNQLTGIVRTPTRFRKVKLYCKTG-----FHLVML--PG----GTLKGSLSAN----- [ 42 ]  
Nv244903 WLPVESTLPASPLTCTTDIRLYCKN-----QLFLOIS--DD----GSVSGTRDQLCPYG [ 48 ]  
HsFGF5 --LEQSSFLQWSPSGR-RTGSLYCRVGIG----FHLQIY--PD----GKVNGSHEA----- [ 42 ]  
MusFGF5 --SEHSSFOQWSPSGR-RTGSLYCRVGIG----FHLQIY--PD----GKVNGSHEA----- [ 42 ]  
MusFGF6 --SGVNWESGYLVGIK-RQRRLYCNVIG----FHLQVP--PD----GRISGTHEE----- [ 43 ]  
HsFGF6 --AGVNWESGYLVGIK-RQRRLYCNVIG----FHLQVL--PD----GRISGTHEE----- [ 43 ]  
HsFGF4 --AVQSGAGDYLLGIK-RLRRLYCNVIG----FHLQAL--PD----GRIGGAHAD----- [ 43 ]  
GgFGF4 --RDAARDGDYLLGYK-RLRRLYCNVIG----FHIQVL--PD----GRIDGIHSE----- [ 43 ]  
Ci456 RLLHPHNNHQPNIKLVRERLYCRVGIG----YQLEVR--KD----GKV TARHQS----- [ 45 ]  
BombyxviralFGF SMADCSALLTHITGTSIPGR LFINR-----RFLAVN--PN----GTVYGGTIESD----- [ 44 ]  
Dmebranchless RNERSTVPQSHLAWTSRKIQLYIKN-----RILQIL--RD----GVVNGTQDEN----- [ 43 ]  
XlFGF41 --KDTSRDSDYLLGIK-RQRRLYCNVIG----FHIQVL--PD----GRINGMHSE----- [ 43 ]  
XlFGF20 ---APSDLSHLQGI-LRRRQLYCRTG-----FHLQIL--PD----GNVQGTRODH----- [ 40 ]  
MusFGF20 --GPGSVELAHLHGI-LRRRQLYCRTG-----FHLQIL--PD----GTVQGTRODH----- [ 42 ]  
HsFGF20 --GPGAAQLAHLHGI-LRRRQLYCRTG-----FHLQIL--PD----GSVQGTRODH----- [ 42 ]  
GgFGF9 --GPAVTDLDHLKGI-LRRRQLYCRTG-----FHLEIF--PN----GTIQGTRODH----- [ 42 ]  
HsFGF9 --GPAVTDLDHLKGI-LRRRQLYCRTG-----FHLEIF--PN----GTIQGTRODH----- [ 42 ]  
MusFGF9 --GPAVTDLDHLKGI-LRRRQLYCRTG-----FHLEIF--PN----GTIQGTRODH----- [ 42 ]  
GgFGF16s --GSPTDFAHLKGI-LRRRQLYCRTG-----FHLEIF--PN----GTVHGTRQDH----- [ 41 ]  
RatFGF16 --GSPTDFAHLKGI-LRRRQLYCRTG-----FHLEIF--PN----GTVHGTRHDH----- [ 41 ]  
MusFGF16 --GSPTDFAHLKGI-LRRRQLYCRTG-----FHLEIF--PN----GTVHGTRHDH----- [ 41 ]  
HsFGF16 --GSPTDFAHLKGI-LRRRQLYCRTG-----FHLEIF--PN----GTVHGTRHDH----- [ 41 ]  
Ci91620 --GMSAYDYDTQETMRRRMLYCKNG-----FNLQIL--RN----GRISGTQESH----- [ 42 ]  
Cs91620 --FMQKYDKDTPQVTMRRKMLYCKNG-----YNIQIL--PN----GRISGTQESH----- [ 42 ]  
Ci371020 --VLLRHKRMVQGGDRMYRLYNRNH-----YFIEIK--QD----GKVRGSYNK----- [ 41 ]  
MusFGF3 --GGRGGVYEHLGG-APRRRKL YCATK-----YHLQLH--PS----GRVNGSLEN----- [ 41 ]  
GgFGF3 --GGRGGVYEHLGG-APRRRKL YCATK-----YHLQIH--PG----GKINGTLEKN----- [ 42 ]  
XlFGF3 --GGRGGVYEHLGG-APRNRKL YCATK-----YHLQIH--LN----GKINGTLEKN----- [ 42 ]  
MusFGF23 --AYPDTSPLLGSNWGSLT-HLYTATAR---TSYHLQIH--RD----GHVDGTPHQ----- [ 44 ]  
HsFGF23 RAYPNASPLLGSWGLI-HLYTATAR---NSYHLQIH--KN----GHVDGAPHQ----- [ 45 ]  
MusFGF21 --PIPDSPLLQFGGQVRQRYLYTDDDQ---DTEAHLEIR--ED----GTVVGAHR----- [ 46 ]  
HsFGF21 HPIPDSPLLQFGGQVRQRYLYTDDAQ---QTEAHLEIR--ED----GTVGGAADQ----- [ 47 ]  
RatFGF22 --PGAPGGYPHLEG-DVRWRRLFSSTH-----FFLRVD--PG----GRVQGT RWRH----- [ 42 ]  
MusFGF22 --PGAPGGYPHLEG-DVRWRRLFSSTH-----FFLRVD--LG----GRVQGT RWRH----- [ 42 ]  
MusFGF7 --ERHTRS YDMEGGDIRVRLFCRTQ-----WYLRID--KR----GKVKGTOEMK----- [ 43 ]  
HsKGF --ERHTRS YDMEGGDIRVRLFCRTQ-----WYLRID--KR----GKVKGTOEMK----- [ 43 ]  
GgFGF7 --ERHTRS YDMEGGDVRVRLFCRTQ-----WYMRID--KR----GKVKG TREATN----- [ 43 ]  
XtropLOC --ERHTRS YDMEGGDVRIRKLF CRTQ-----WYLRID--KR----GNVKG TQDPN----- [ 43 ]  
XtropFGF10 --SRHVSYNHLQG-DVRSRKLFSYTK-----YFLQID--GN----GTVSGTKKEN----- [ 42 ]  
GgFGF10 --GRHVSYNHLQG-DVRKRKL YSYNK-----YFLKIE--KN----GKVSGTKKEN----- [ 42 ]

HsFGF10 -GRHVRSYNHLOG-DVRWRKLFSTFK-----YFLKIE--KN----GKVSGETKKEN---- [ 42 ]  
GgFGF19 -----GWGEP IRLRHLHLPKGLFSCFLRIG--GD----GRVDAVGSQ----- [ 39 ]  
HsFGF19 -----GWGDP IRLRHLITS-GPHGLSSCFLRIR--AD----GVVDCARGQ----- [ 38 ]  
DrFGF2 AAPDAENSSFPAGSFRDPKRLYCKNG--G---FFLRIN--AD----GRVDGARDKS---- [ 45 ]  
HsFGF2 LPEDGGSGAFPPGHFKDPKRLYCKNG--G---FFLRIH--PD----GRVDGVREKS---- [ 45 ]  
MusFGF2 LPEDGG-AAFPPGHFKDPKRLYCKNG--G---FFLRIH--PD----GRVDGVREKS---- [ 44 ]  
GgFGF1 -TALTERFGLPLGNKPKLLYCSNG--G---HFLRIL--PD----GKVDGTRDRS---- [ 44 ]  
HsFGF1 -TALTEKFNLPNGYKPKLLYCSNG--G---HFLRIL--PD----GTVDGTDRS---- [ 44 ]  
MusFGF1 -AALTERFNPLGNKPKLLYCSNG--G---HFLRIL--PD----GTVDGTDRS---- [ 44 ]  
DrFGF1 MTEADIAVKSSPRDYKLRRLYCMNG--G---FHLQIL--AD----GTVAGAADEN---- [ 45 ]  
CsFGF1114 -AGGQIKIKESQLKGVKTQIFSRQG-----FYLDIDR-ES----GEVRGVQEE----- [ 43 ]  
CiFGF1114 -VGGQLKGVRESQLKGVKTRLYSRHG-----FYLDIDR-EN----GGVKGVDDD----- [ 43 ]  
Dmepyrampus -----TLSKHSELALHIN-----SHGKVT-----AENILRTYQYF---- [ 30 ]  
Dmethisbe ---LLFFIVVISGALCTVEDYVIMSQCAHNKAIHIAAE-----GTVSVTDTTSQ---- [ 45 ]  
ApisMGC84348 VIWDPRKPAQNPVYNCLVIKLF CRTG-----YHLGVS--ES----GRVRGLSATN---- [ 44 ]  
Celegl17 TCARFQIKPNVHYLGETHWQLFNECS-----QGMLQSF-----LGSLNTRGYP---- [ 43 ]  
SpurpXP787124 RRKASSRGSTLIYNSKOPTQLFCRTN-----FRLACVHE-D----GTINGTRDNMDVY- [ 48 ]  
HsFGF11 -RPARPDRGPEPQLKGI VTKLFCRQG-----FYLQAN--PD----GSIQGTPEDT---- [ 43 ]  
MusFGF11 -RPTRODRGPEPQLKGI VTKLFCRQG-----FYLQAN--PD----GSIQGTPEDT---- [ 43 ]  
CeLLET756 QLQDEEENGYPADRRRRLGALFCRSG---TWLEMLPIENPDDGSTRVKVHGTTKEES---- [ 53 ]  
RatFGF11 -RPTRODRGPEPQLKGI VTKLFCRQG-----FYLQAN--PD----GSIQGTPEDT---- [ 43 ]  
MusFGF13 --KRRRRRPEPQLKGI VTKLYSRQG-----YHLQLQ--AD----GTIDGTDKED---- [ 42 ]  
GgFGF13 -----KEPQLKGI VTKLYSRQG-----YHLQLQ--AD----GTIDGTDKEED---- [ 35 ]  
HsFGF13 --HKENTEPEEPQLKGI VTKLYSRQG-----YHLQLQ--AD----GTIDGTDKED---- [ 42 ]  
XlFGF13 --LKEHTEPEEPQLKGI VTKLYSRQG-----YHLQLQ--PD----GTIDGAKKEE---- [ 42 ]  
HsFGF12 -----MASKEPQLKGI VTRLF SQOG-----YFLQMH--PD----GTIDGTDKEN---- [ 38 ]  
Cilarge KGADKGGVVGNGERLHNTLYIKRS-----STTMRIL--PS----GRVHGSRDID---- [ 45 ]  
GgFGF11B -----MEGKEPQLKGI VTRLF SQOE-----YFLQMH--PD----GTIDGTDKEN---- [ 38 ]  
RatFGF12 -RKRPRRRRPEPQLKGI VTRLF SQOG-----YFLQMH--PD----GTIDGTDKEN---- [ 43 ]  
MusFGF12A -RKRPRRRRPEPQLKGI VTRLF SQOG-----YFLQMH--PD----GTIDGTDKEN---- [ 43 ]  
GgFGF41A -KKRRL-RRQDPQLKGI VTRLYCRQG-----YYLQMH--PD----GSLDGTKDDS---- [ 42 ]  
HsFGF14 -KKRRL-RRQDPQLKGI VTRLYCRQG-----YYLQMH--PD----GALDGTKDDS---- [ 42 ]  
RatFGF14 -KKRRL-RRQDPQLKGI VTRLYCRQG-----YYLQMH--PD----GALDGTKDDS---- [ 42 ]  
MusFGF14 -----MH--PD----GALDGTKDDS---- [ 14 ]  
GgFGF14 -SLKKNKNQTDQPQLKGI VTRLYCRQG-----YYLQMH--PD----GSLDGTKDDS---- [ 43 ]  
HsFGF14IB -SLKKNKNPTDPQLKGI VTRLYCRQG-----YYLQMH--PD----GALDGTKDDS---- [ 43 ]  
MusFGF14b -SLKKNKNPTDPQLKGI VTRLYCRQG-----YYLQMH--PD----GALDGTKDDS---- [ 43 ]  
Ci81718 -----SSSTRYCEIYSKRTS-----NHIRILG-----KKVDGRGRRG---- [ 33 ]  
Cs817182 -----RSQTASTRRYIYAKAT-----SSRVQILG-KR----VNAKGVRGNK---- [ 38 ]  
Cs817181 -----LFP-NQY----CSAKNVQFP---- [ 15 ]  
RatFGF8 ----SLVTDQLSRRLIRTYQLYSRTS-----GKHVQVLANKR----INAMAEDGDP---- [ 43 ]  
MusFGF8 -REQSLVTDQLSRRLIRTYQLYSRTS-----GKHVQVLANKR----INAMAEDGDP---- [ 46 ]  
GgFGF8 -REQSLVTDQLSRRLVRYTYQLYSRTS-----GKHVQILDNKK----INAMAEDGDV---- [ 46 ]  
XlFGF8 -REQSLVTDQLSRRLIRTYQLYSRTS-----GKHVQILANKK----INAMAEDGDP---- [ 46 ]  
HsFGF17 -RDQAMTDQLSRROIREYQLYSRTS-----GKHVQVTG-RR----ISATAEDGNK---- [ 45 ]  
MusFGF17 -RDQAMTDQLSRROIREYQLYSRTS-----GKHVQVTG-RR----ISATAEDGNK---- [ 45 ]  
HsFGF18 -ENQTRARDDVSRKQLRLYQLYSRTS-----GKHQVVLG-RR----ISARGEDGDK---- [ 45 ]  
MusFGF18 -ENQTRARDDVSRKQLRLYQLYSRTS-----GKHQVVLG-RR----ISARGEDGDK---- [ 45 ]  
  
NvFGF1D -----SKYAELEFHSVGA---GLHMIVGVATRRYLITDKGLLTAQLQPSLN----S [ 63 ]  
NvFGF8A -----DQYAKLIIESDG-F--GRVRI RGAETK FYLCMDKRRRLRARKRARNKK--NC [ 84 ]  
NvFGF1B -----VNETFELQSYGP---SIVRIRHVKTGFFIAMDRRGRRLRAKRVSESRR-WDT [ 87 ]  
NvFGF1E -----DQYSALEFQSLGA---GKVI I KGVVTGRYLAINDQGLLYSTDTFHKE----A [ 79 ]  
Nv247007 -----SRYALMKIETAGLN--GLFRAKAIATNLYLSMDSRGRLYTTRNRTEEN---V [ 89 ]  
NvFGF1C -----SPNSVLEFLSVGP---DLIAIGGHAADKYLAVDNQ GKIFTSNSERKE----C [ 87 ]  
NvFGF1A -----SKYIHFEMQSF GP---SLVKLKS VATGRYLSMKRDGALRTTKHLRSRE---T [ 88 ]  
Nv208072 -----ENKAKLIIESTAFG--GOVRVRSFHDNKYLCITRHGDISI EESVLGRSLDRC [ 104 ]  
Nv211797 -----NPNVKLQLQSVGQ---SLVRF FGI RARKYLAMDKNGLYTTAKATSE----T [ 99 ]

NvFGF8B -----DIYAKVIVQSVTF---GRIXIRGIKSNRMLCLNKYGKLVGRKK-RKK----C [ 87 ]  
 Nv204532 -----YAKLILESDFG----GRVKIKGDKTKHYLCIKKDGRLTSRKIPKSP---KC [ 89 ]  
 Nv212165 -----ITSMYGLFELESYGR---SLIRVKSVPDMYIAISNTGQVYATANTSVE----T [ 89 ]  
 Nv244903 QYTFYKEYYMETTLEIHTLSK---NTVRIYSPKVKKYLAIDSNGRLCSK GKASED----T [ 101 ]  
 HsFGF5 -----NMLSVLEIFAVSQ---GIVGIRGVFSNKFLAMSKKGLHASAKFTDD----C [ 87 ]  
 MusFGF5 -----SVLSILEIFAVSQ---GIVGIRGVFSNKFLAMSKKGLHASAKFTDD----C [ 87 ]  
 MusFGF6 -----NPYSLLEISTVER---GVVSLFGVKSALFIAMNSKGRLYTTPSFHDE----C [ 88 ]  
 HsFGF6 -----NPYSLLEISTVER---GVVSLFGVRSALFVAMNSKGRLYATPSFQEE----C [ 88 ]  
 HsFGF4 -----TRDSLLELSPVER---GVVSI FGVASRFFVAMSSKGLYGSPPFTDE----C [ 88 ]  
 GgFGF4 -----NRYSLLEISPVER---GVVSI FGVRSGLFVAMNSKGLYGSTHVNDE----C [ 88 ]  
 Ci456 -----TKNGIFEVFSMKH---GVVGIRSERHRRYVCMNKRGRVFTRRSFRHD----C [ 90 ]  
 BombyxviralFGF -----NADTTFKRLAVDR---NRIVIQNAITCVYLCIDRCGQLYGSKTLSDD----C [ 89 ]  
 Dmbranchless -----SEFTILQRSTVDV---GRIKIQSVATCLYL CMDACGVPGSKDFDDE----C [ 88 ]  
 XlFGF41 -----NRYSLLELSPVEV---GVVSLYGVKSGMFVAMNAKGLYGSRYFNEE----C [ 88 ]  
 XlFGF20 -----SRFGILEFISVAI---GLVSI RGVDTGLYLG MNDKGELFGSEKLTSE----C [ 85 ]  
 MusFGF20 -----SLFGILEFISVAV---GLVSI RGVDSGLYLG MNDKGELYGSEKLTSE----C [ 87 ]  
 HsFGF20 -----SLFGILEFISVAV---GLVSI RGVDSGLYLG MNDKGELYGSEKLTSE----C [ 87 ]  
 GgFGF9 -----SRFGILEFISIAV---GLVSI RGVDSGLYLG MNEKGELYGSEKLTQE----C [ 87 ]  
 HsFGF9 -----SRFGILEFISIAV---GLVSI RGVDSGLYLG MNEKGELYGSEKLTQE----C [ 87 ]  
 MusFGF9 -----SRFGILEFISIAV---GLVSI RGVDSGLYLG MNEKGELYGSEKLTQE----C [ 87 ]  
 GgFGF16s -----SRFGILEFISLAV---GLVSI RGVDSGLYLG MNERGELYGSKKLTRE----C [ 86 ]  
 RatFGF16 -----SRFGILEFISLAV---GLVSI RGVDSGLYLG MNERGELFGSKKLTRE----C [ 86 ]  
 MusFGF16 -----SRFGILEFISLAV---GLVSI RGVDSGLYLG MNERGELYGSKKLTRE----C [ 86 ]  
 HsFGF16 -----SRFGILEFISLAV---GLVSI RGVDSGLYLG MNERGELYGSKKLTRE----C [ 86 ]  
 Ci91620 -----NQYAVLEFISTGI---GSLTIRGVASGLYLAMNSKGRLYASETFNRE----C [ 87 ]  
 Cs91620 -----SEYAVLEFISTGV---GSLTIRGVASGLYLAMNSKGRLYGSETFTHE----S [ 87 ]  
 Ci371020 -----SPQTEIEVQSVAAAG---GVIRFYSPSTGRYLAMNRHSKLYASRNYRKID---C [ 88 ]  
 MusFGF3 -----SAYSILEITAVEV---GVVAIKGLFSGRYLAMNKRGRLYASDHYNAE----C [ 86 ]  
 GgFGF3 -----SVFSILEITAVDV---GIVAIKGLFSGRYLAMNKRGRLYASENYNTE----C [ 87 ]  
 XlFGF3 -----SVFSILEITAVDV---GIVAIKGLFSGRYLAMNQGRGRLYASETYNPE----C [ 87 ]  
 MusFGF23 -----TIYSALMITSEDA---GSVVITGAMTRRFLCMDLHGNI FGS LHFSPEN---C [ 90 ]  
 HsFGF23 -----TIYSALMIRSEDA---GFVVITGVMSRRYLCMDFRGNIFGSHYFDPEN---C [ 91 ]  
 MusFGF21 -----SPESLLEKALKP---GVIQILGVKASRFLCQOPDGALYGS PHFDPEA---C [ 92 ]  
 HsFGF21 -----SPESLLEKALKP---GVIQILGVKTSRFLCQRPDGALYGS LHFDPPEA---C [ 93 ]  
 RatFGF22 -----GQDSIVEIRSVRV---GTVVIKAVYSGFYVAMNRRGRLYGSRVYSVD---C [ 87 ]  
 MusFGF22 -----GQDSIVEIRSVRV---GTVVIKAVYSGFYVAMNRRGRLYGSRVYSVD---C [ 87 ]  
 MusFGF7 -----NSYNIMEIRTAVV---GIVAIKGVSESEYFLAMNKEGKLYAKKECNE----C [ 88 ]  
 HsKGF -----NNYNIMEIRTAVV---GIVAIKGVSESEYFLAMNKEGKLYAKKECNE----C [ 88 ]  
 GgFGF7 -----NNYSILEIRTAVV---GIVAIKGVSESEYFLAMNKSGRLYGKVCNE----C [ 88 ]  
 XtropLOC -----NSFSILEIRTAVV---GIVAIKCI ESEYFLAMNKSGRLYGKVCNE----C [ 88 ]  
 XtropFGF10 -----CPYSILEITSVDV---GVVAVKAINS NYL AMNRRGKIYGSKEFNID---C [ 87 ]  
 GgFGF10 -----CPFSILEITSVEI---GVVAVKSIKSNYYLAMNKKGKVYGSKEFNSD---C [ 87 ]  
 HsFGF10 -----CPYSILEITSVEI---GVVAVKAINS NYL AMNKKGKLYGSKEFNND---C [ 87 ]  
 GgFGF19 -----SPOSLEIRAVAV---RTVAIKGVQSSRYLCMDEAGRLHGQLSYSIED---C [ 85 ]  
 HsFGF19 -----SAHSLEIKAVAL---RTVAIKGVHVSRYLCMGADGKMOGLLOYSEED---C [ 84 ]  
 DrFGF2 -----DPHIRLQLQATAV---GEVLIKIGICTNRFLAMNADGRLFGTKRTTDE---C [ 90 ]  
 HsFGF2 -----DPHIKQLQAEER---GVVSIKGV CANRYLAMKEDGRL LASKCVTDE---C [ 90 ]  
 MusFGF2 -----DPHVKLQLQAEER---GVVSIKGV CANRYLAMKEDGRL LASKCVTEE---C [ 89 ]  
 GgFGF1 -----DQHIQLQLSAEDV---GEVYIKSTASGOYLAMDTNGLLYGSQLPGEE---C [ 89 ]  
 HsFGF1 -----DQHIQLQLSAESV---GEVYIKSTETGOYLAMDTDGLLYGSQTPNEE---C [ 89 ]  
 MusFGF1 -----DQHIQLQLSAESA---GEVYIKGTETGOYLAMDT EGLLYGSQTPNEE---C [ 89 ]  
 DrFGF1 -----TYSILRIKATSP---GVVIEGSETGLYLSMNEHGKLYASSLVTDE---S [ 89 ]  
 CsFGF1114 -----SDSTVFFLIPVGL---RIVSIQHTQTL LYIAMNSEGRLYTTESYTME---C [ 88 ]  
 CiFGF1114 -----SESTIFYLIPVGL---RIVSIQHSETLLYIAMNSEGRLYTTDVTYME---C [ 88 ]  
 Dmepyramus -----NMEAVNDVFSLD---FKITIYSADVDYYLCFH-HGRLVGKRNATKE---C [ 73 ]  
 Dmethisbe -----IQNITIVGFPDYLNN-EFKIALYAKETRRYLCFNDNWRLVGMREL RDT---C [ 93 ]  
 ApisMGC84348 -----EPHALLHIIPVSF---GVVRIQNIETSLYLAFNKKGRLYGELNGNKD---N [ 89 ]  
 Celegl17 -----DKHCLTDWNVVGEWD-GKFRLOHAQSRKFLCFNKRARITLRFNGSDAK---C [ 91 ]

SpurpXP787124 -----SSLY---IQSQR--SIVSIKGLRSQLYVCVDDSGSLYGDTRVSRN----C [ 90 ]  
 HsFGF11 -----SSFTHFNLIIPVGL---RVVTIQSAKLGHYAMNAEGLLYSSPHFTA-----C [ 88 ]  
 MusFGF11 -----SSFTHFNLIIPVGL---RVVTIQSAKLGHYAMNAEGLLYSSPHFTA-----C [ 88 ]  
 CellET756 -----SKFSIVEFVSVAM---SLVSIQGVETKNFICMDPSGKLYATPSSNYS--TEC [ 100 ]  
 RatFGF11 -----SSFTHFNLIIPVGL---RVVTIQSAKLGHYAMNAEGLLYSSPHFTA-----C [ 88 ]  
 MusFGF13 -----STYTLFNLIIPVGL---RVVAIQGVQTKLYLAMNSEGYLYTSEHFTPE----C [ 87 ]  
 GgFGF13 -----SSYTLFNLIIPVGL---RVVAIQGVQTKLYLAMNSEGYLYTSEHFTPE----C [ 80 ]  
 HsFGF13 -----STYTLFNLIIPVGL---RVVAIQGVQTKLYLAMNSEGYLYTSELFTPE----C [ 87 ]  
 XlFGF13 -----SSATVFNLIIPVGL---RVVAIQGVQTKLYLAMNSEGYLYTSEHFTPE----C [ 87 ]  
 HsFGF12 -----SDYTLFNLIIPVGL---RVVAIQGVKASLYVAMNGEGYLYSSDVFTPE----C [ 83 ]  
 Cilarge -----VYCIVRFQITIGQKGNLIVKIRGEKSGLYLAMKRNGKLYATRDNPNPD---T [ 93 ]  
 GgFGF11B -----SDYTLFNLIIPVGL---RVVAIQGVKAGLYVAMNAEGYLYSSDVFTPE----C [ 83 ]  
 RatFGF12 -----SDYTLFNLIIPVGL---RVVAIQGVKASLYVAMNGEGYLYSSDVFTPE----C [ 88 ]  
 MusFGF12A -----SDYTLFNLIIPVGL---RVVAIQGVKASLYVAMNGEGYLYSSDVFTPE----C [ 88 ]  
 GgFGF41A -----SNSTLFNLIIPVGL---RVVAIQGVKTGLYIALNNEGFLYTSELFTPE----C [ 87 ]  
 HsFGF14 -----TNSTLFNLIIPVGL---RVVAIQGVKTGLYIAMNGEGYLYPSELFTPE----C [ 87 ]  
 RatFGF14 -----TNSTLFNLIIPVGL---RVVAIQGVKTGLYIAMNGEGYLYPSELFTPE----C [ 87 ]  
 MusFGF14 -----TNSTLFNLIIPVGL---RVVAIQGVKTGLYIAMNGEGYLYPSELFTPE----C [ 59 ]  
 GgFGF14 -----SNSTLFNLIIPVGL---RVVAIQGVKTGLYIALNNEGFLYTSELFTPE----C [ 88 ]  
 HsFGF14IB -----TNSTLFNLIIPVGL---RVVAIQGVKTGLYIAMNGEGYLYPSELFTPE----C [ 88 ]  
 MusFGF14b -----TNSTLFNLIIPVGL---RVVAIQGVKTGLYIAMNGEGYLYPSELFTPE----C [ 88 ]  
 Ci81718 -----SNHAKLIIHSGKLW--GRIMIQGVQTERFLCMNKRGRVLGKYNRKAINDPKC [ 83 ]  
 Cs817182 -----YSKMAILSTSFSG----GRIMIQGVETGRVLCMNRKGRVLGKVLRRRAKHDLKC [ 86 ]  
 Cs817181 -----AAKMAILSTSFSG----GRIMIQGVETGRVLCMNRKGRVLGKVLRRRAKHDLKC [ 63 ]  
 RatFGF8 -----FAKLIVETDTFG----SRVRVGAETGLYICMNKKGKLIAKSNGKGGK---DC [ 88 ]  
 MusFGF8 -----FAKLIVETDTFG----SRVRVGAETGLYICMNKKGKLIAKSNGKGGK---DC [ 91 ]  
 GgFGF8 -----HAKLIVETDTFG----SRVRIKGAATGFYICMNKKGKLIKSNKGGK---DC [ 91 ]  
 XlFGF8 -----HAKLIVETDTFG----SRVRIKGAETGYIICMNKKGKLIKTNRGGK---DC [ 91 ]  
 HsFGF17 -----FAKLIVETDTFG----SRVRIKGAESEKYICMNKRKGLIGKPSGKSK---DC [ 90 ]  
 MusFGF17 -----FAKLIVETDTFG----SRVRIKGAESEKYICMNKRKGLIGKPSGKSK---DC [ 90 ]  
 HsFGF18 -----YAQLLVETDTFG----SQVRIKGETEFYLCMNRKGLVKGKPDGTSK---EC [ 90 ]  
 MusFGF18 -----YAQLLVETDTFG----SQVRIKGETEFYLCMNRKGLVKGKPDGTSK---EC [ 90 ]  
  
 NvFGF1D VFKEIFLENLYQSFLSYKHQR-----NGWYVAIKRNGKAKPAV--QTFIQG [ 107 ]  
 NvFGF8A IFKDHAFADNAFNEFESVKY-----EGHYIAFNRRRGLQRSRK--RKPAAA [ 126 ]  
 NvFGF1B FFYQOLEHNLQFSFSSTKYKYNP-----YDMFIGLKRSGLTKEWS--RDSTRTG [ 135 ]  
 NvFGF1E IMEEKQEEFNYSFNSHRYRQPG-----WYVALRRN-GQ----- [ 112 ]  
 Nv247007 FRKKDSPSHGWFTYESYKY-----CDMYIGFKRNHHPRLGF--KVKPGK [ 131 ]  
 NvFGF1C VFRELTKGNFYTLIRTCHSDIHG-----HGWYLSINNRGRVATKT--CTYSDH [ 133 ]  
 NvFGF1A IFQEIHELNAFHSYASHRYFMQNP-----HDMLVAIKRNGQIKRAT--KTKPGQ [ 135 ]  
 Nv208072 AFIQKQQ-KGFTVVISKIH-----KTWALGVRNDGRIKPAR--KTTSTQ [ 145 ]  
 Nv211797 VFRNILGSTDYHTFSSANNHKG-----RPMYLGLENKPKKGS--KTRGSH [ 145 ]  
 NvFGF8B MFEDILL-NGYQTFESVRY-----PCWFVAINKRGRAVKGHLMSMRGKRT [ 130 ]  
 Nv204532 VFKEAYTDDFFTQFISA-YN-----PKWMITVSKKGHTRPGF--KGRNGS [ 131 ]  
 Nv212165 LLRETRAENYFHTFSSYOYNGEDR-----HKQWYLAIKONGHVKNAS--TVLKQH [ 137 ]  
 Nv244903 VLHHTHELNDNFHTFASQKYYKDS-----AHDMFVALQRDQPRKAT--TTYRLH [ 148 ]  
 HsFGF5 KFRERFQENSYNTYASAIHRTEKTG-----REWYVALNKRKAKRGCSPRVKPOH [ 137 ]  
 MusFGF5 KFRERFQENSYNTYASAIHRTEKTG-----REWYVALNKRKAKRGCSPRVKPOH [ 137 ]  
 MusFGF6 KFRETLLPNNYNAYE-----SDLY-----RGTYIALSKYGRVKRGS--KVSPIM [ 130 ]  
 HsFGF6 KFRETLLPNNYNAYE-----SDLY-----QGTYIALSKYGRVKRGS--KVSPIM [ 130 ]  
 HsFGF4 TFKEILLPNNYNAYE-----SYKY-----PGMFIALSKNGKTKKGN--RVSPTM [ 130 ]  
 GgFGF4 KFKEILLPNNYNAYE-----SRIY-----PGMYIALSKNGRTKKGN--KVSPTM [ 130 ]  
 Ci456 EFREELEANGYVTFASQLYSDHQWR-----LGYFLAMSKRKGKPRRGK--RVTWKM [ 138 ]  
 BombyxviralFGF FMREIMEKNNYNTYKMYDR-----KLTYVALKNDGTPRKLQISKGRKLG [ 134 ]  
 Dmebranchless VFNENMGLQNYNTYSSTYHSQAR-----RVFYALNGSGQPRRTQIPASRSLG [ 136 ]  
 XlFGF41 KFRETLLPNNYNAYE-----SRKY-----PGMYIALGKNGRTKKGN--RVSPTM [ 130 ]  
 XlFGF20 IFREQFEENWYNTYSSNLYKHGDSG-----RRYFVALNKDGTPRDGT--RAKRHQ [ 133 ]  
 MusFGF20 IFREQFEENWYNTYSSNIYKHGDTG-----RRYFVALNKDGTPRDGA--RSKRHQ [ 135 ]

HsFGF20 IFREQFEENWYNTYSSNIYKHGDTG-----RRYFVALNKDGTPRDGA--RSKRHQ [135]  
GgFGF9 VFREQFEENWYNTYSSNLYKHVDTG-----RRYYVALNKDGTTPREGT--RTKRHQ [135]  
HsFGF9 VFREQFEENWYNTYSSNLYKHVDTG-----RRYYVALNKDGTTPREGT--RTKRHQ [135]  
MusFGF9 VFREQFEENWYNTYSSNLYKHVDTG-----RRYYVALNKDGTTPREGT--RTKRHQ [135]  
GgFGF16s VFREQFEENWYNTYASTLYKHPDSE-----RHYYVALNKDGSPREGY--RTKRHQ [134]  
RatFGF16 VFREQFEENWYNTYASTLYKHS DSE-----RQYYVALNKDGSPREGY--RTKRHQ [134]  
MusFGF16 VFREQFEENWYNTYASTLYKHS DSE-----RQYYVALNKDGSPREGY--RTKRHQ [134]  
HsFGF16 VFREQFEENWYNTYASTLYKHS DSE-----RQYYVALNKDGSPREGY--RTKRHQ [134]  
Ci91620 IFYETVLENNQNTFESFAHRNGSKK-----CYIALGRH-GRPQGC--RLHPNN [133]  
Cs91620 IFYESVLENKQNTFESFAHRNGSRR-----CYIALGRH-GRPQGC--RVHPNN [133]  
Ci371020 DFVERWQ-DFYATYRSLHQPNRRRRRSK-----AREWYIGIDKRGRSRKGR--NVKPES [140]  
MusFGF3 EFVERIHELGYNTYASRLYRTGSSGPGAQRPGAQRPWYVSVNGKGRPRRGF--KTRRTQ [144]  
GgFGF3 EFVERIHELGYNTYASRLYRTVPSGASTKRKASAERLWYVSVNGKGRPRRGF--KTRRTQ [145]  
XlFGF3 EFVERIHELGYNTYASRLYRTVPSGAGTKRKASAERLWYVSVNGKGRPRRGF--KTRRTQ [145]  
MusFGF23 KFRQWTLNENGYDVYLSQKHHYLVSLGRAK--RIFQPGTNPPPSQFLARRNEVPLLHFYT [148]  
HsFGF23 RFQHQTLNENGYDVYHSPQYHFLVSLGRAK--RAFLPGMNPPPSQFLSRRNEIPLIHFNT [149]  
MusFGF21 SFRELLLEDGYNVYQSEAHGLPLRLPQKD--SPNQDATSWGP-VRFLPMPG---LLHEPQ [146]  
HsFGF21 SFRELLLEDGYNVYQSEAHGLPLHLPGNK--SPHRDPAPRGP-ARFLPLPG---LPPALP [147]  
RatFGF22 RFRERIEENGYNTYASRRWRH--HG-----RPMFLALDSOGIPROGR--RTRRHQ [133]  
MusFGF22 RFRERIEENGYNTYASRRWRH--RG-----RPMFLALDSOGIPROGR--RTRRHQ [133]  
MusFGF7 NFKELILENHYNNTYASAKWTH--SG-----GEMFVALNQKGI PVK GK--KTKKEQ [134]  
HsKGF NFKELILENHYNNTYASAKWTH--NG-----GEMFVALNQKGI PVK GK--KTKKEQ [134]  
GgFGF7 NFIELIEENHYNNTYASAKWTH--KG-----KEMFVTLNHKGVP MK GK--KTKKEH [134]  
XtropLOC NFRELIOENKYNTYASAKWTN--NG-----KEMFVALNSKGS PMK GK--KSKKEH [134]  
XtropFGF10 KLKERIEENGYNTYASHNWK N--NE-----RQMFVALNGKGI PKR GP--KTRRKN [133]  
GgFGF10 KLKERIEENGYNTYASLNWK H--NG-----RQMFVALNGRGATKRGQ--KTRRKN [133]  
HsFGF10 KLKERIEENGYNTYASFNWQH--NG-----RQMYVALNGK GAPR RGQ--KTRRKN [133]  
GgFGF19 SFEEEEIRPDGYNVYKSKKYGISVLS SAKQ-RQQFKGKDFLPLSHFLPMINTVPVEV TDF [144]  
HsFGF19 AFE E EIRPDGYNVYRSEKHRLPVLS SAKQ-RQLYKNRGFLPLSHFLPMLPMVPEEPEDL [143]  
DrFGF2 YFLERLESNNYNTYRSR K-----YPDWYVALKRTGQYKSGS--KTSPGQ [132]  
HsFGF2 FFFERLESNNYNTYRSR K-----YTSWYVALKRTGQYKLSG--KTGPGQ [132]  
MusFGF2 FFFERLESNNYNTYRSR K-----YSSWYVALKRTGQYKLSG--KTGPGQ [131]  
GgFGF1 LFLERLEENHYNNTYISKKHA-----DKNWFVGLKKNNGSKLGP--RTHYGQ [133]  
HsFGF1 LFLERLEENHYNNTYISKKHA-----EKNWFVGLKKNNGSCKRGP--RTHYGQ [133]  
MusFGF1 LFLERLEENHYNNTYISKKHA-----EKNWFVGLKKNNGSCKRGP--RTHYGQ [133]  
DrFGF1 YFLEKMEENHYNNTYQSQK-H-----GENWYVGIKKNNGKMKRGP--RTHIGQ [132]  
CsFGF1114 KFKE SVYDNYVYVYTS CIYKQLQSG-----RRWNVGMTKEGVPLKGS--QAKKHK [136]  
CiFGF1114 KFKE SVHDNYVYVYTS CIYKQLQSG-----RPWNVGM SKDGI PVK GS--HAKKHK [136]  
Dmepyramus HFKEGIFMGNQNFSSAYN-----PVLRVGFKGNFKPIGLNDFSKPKVM [116]  
Dmethisbe YFNETIVHGYFVFRSVVD-----LQRRVGFTHRGKPVGP---KKS VND [133]  
ApisMGC84348 TEWEQWNVGSYDAFRSRKYAN-----YGWVIGIKKNNGRAKPGP--RTSWGQ [133]  
Celegl17 TFIIEVRDNGFSRLRSSWKPELYLGFNG-----RGRFQNP LSYHLKPRCFDWIKLVRYV [145]  
SpurpXP787124 YFOEKLEPNFFNTYA---YKMPDSTSKRRRH----RTLFLSINKYGESRIAK----VRTQ [139]  
HsFGF11 RFKECVFENYVLYASALYRQRSG-----RAWYLGLDKEGQVMKGN--RVKTK [136]  
MusFGF11 RFKECVFENYVLYASALYRQRSG-----RAWYLGLDKEGRVMKGN--RVKTK [136]  
CelLET756 VFLEEMMENYNYLYASACAYGDR-----FNPWYIELRRSGKPRRGF--NSKKRR [146]  
RatFGF11 RFKECVFENYVLYASALYRQRSG-----RAWYLGLDKEGRVMKGN--RVKTK [136]  
MusFGF13 KFKE SVFENYVTYSSMIYRQQSG-----RGWYLGLNKEGEIMKGN--HVKKNK [135]  
GgFGF13 KFKE SIFENYVTYSSMIYRQQSG-----RGWYLGLNKEGEIMKGN--HVKKNK [128]  
HsFGF13 KFKE SVFENYVTYSSMIYRQQSG-----RGWYLGLNKEGEIMKGN--HVKKNK [135]  
XlFGF13 KFKE SVFENYVTYSSMIYRQQHSG-----RSWFLGLNKEGEIMKGN--HVKKNK [135]  
HsFGF12 KFKE SVFENYVIYSSTLYRQQESG-----RAWFLGLNKEGQIMKGN--RVEKTK [131]  
Cilarge TFEHIYSPSEYDAYRSQTQRFFVAFNRAG---ESVRSRSLEKANTHLLRRDASEQLRQNL [150]  
GgFGF11B KFKE SVFENYVIYSSTLYRQQESG-----RAWFLGLNKEGQIMKGN--RVKTK [131]  
RatFGF12 KFKE SVFENYVIYSSTLYRQQESG-----RAWFLGLNKEGQIMKGN--RVKTK [136]  
MusFGF12A KFKE SVFENYVIYSSTLYRQQESG-----RAWFLGLNKEGPI MKGN--RVKTK [136]  
GgFGF41A KFKE SVFENYVIYS SMLYRQQESG-----RAWFLGLNKEGQVMKGN--RVKTK [135]  
HsFGF14 KFKE SVFENYVIYS SMLYRQQESG-----RAWFLGLNKEGQAMKGN--RVKTK [135]

RatFGF14 KFKESVFENYYVIYSSMLYRQOESG-----RAWFLGLNKEGQVMKGN--RVKKT [ 135 ]  
MusFGF14 KFKESVFENYYVIYSSMLYRQOESG-----RAWFLGLNKEGQVMKGN--RVKKT [ 107 ]  
GgFGF14 KFKESVFENYYVIYSSMLYRQOESG-----RAWFLGLNKEGQVMKGN--RVKKT [ 136 ]  
HsFGF14IB KFKESVFENYYVIYSSMLYRQOESG-----RAWFLGLNKEGQAMKGN--RVKKT [ 136 ]  
MusFGF14b KFKESVFENYYVIYSSMLYRQOESG-----RAWFLGLNKEGQVMKGN--RVKKT [ 136 ]  
Ci81718 LFFEEMLENYFDFNSK-----FRDWHIGFHSNGRPRKGP-HTKEIGT [ 126 ]  
Cs817182 QFNDLMPNLFDFYFTNVAH-----PKWYVAFNSHGRPKKGP--TTKLGO [ 128 ]  
Cs817181 QFNDLMPNLFDFYFTNVAH-----PKWYVAFNSHGRPKKGP--TTKLGO [ 105 ]  
RatFGF8 VFTEIVLENNYTALQNAKY-----EGWYMAFTRKGRPRKGS--KTRQHQ [ 130 ]  
MusFGF8 VFTEIVLENNYTALQNAKY-----EGWYMAFTRKGRPRKGS--KTRQHQ [ 133 ]  
GgFGF8 VFTEIVLENNYTALQNAKY-----EGWYMAFTRKGRPRKGS--KTRQHQ [ 133 ]  
XlFGF8 VFSEIVLENNYTALQNVKY-----EGWFMAFTRRGRPRKGS--KTRQHQ [ 133 ]  
HsFGF17 VFTEIVLENNYTAQNARH-----EGWFMAFTRQGRPRQAS--RSRQNO [ 132 ]  
MusFGF17 VFTEIVLENNYTAQNARH-----EGWFMAFTRQGRPRQAS--RSRQNO [ 132 ]  
HsFGF18 VFIEKVLLENNYTALMSAKY-----SGWYVGFTHKGRPRKGP--KTRENO [ 132 ]  
MusFGF18 VFIEKVLLENNYTALMSAKY-----SGWYVGFTHKGRPRKGP--KTRENO [ 132 ]

NvFGF1D KAT-----QFMTRYES----- [ 118 ]  
NvFGF8A WKS-----VQFLERPP----- [ 137 ]  
NvFGF1B FCS-----IFNPPCPSKRIKS----- [ 151 ]  
NvFGF1E ----- [ 112 ]  
Nv247007 HTA-----HFLEI----- [ 139 ]  
NvFGF1C PQL-----HFIVKVIKENQENNGKSESTRNSTP----- [ 161 ]  
NvFGF1A TAT-----QFLVIKS----- [ 145 ]  
Nv208072 RAA-----HFLEL----- [ 153 ]  
Nv211797 RSA-----QFOVLAVI----- [ 156 ]  
NvFGF8B RFFM----- [ 134 ]  
Nv204532 RSV-----QFIAR----- [ 139 ]  
Nv212165 RSH-----QFQVVDQTVPEPLLEPSKDESNVKQHRCRFL----- [ 171 ]  
Nv244903 KAS-----QFLIVLKLCKGKEDFGTAIYSERYNTKVPEALY----- [ 184 ]  
HsFGF5 IST-----HFLPRFKQSEQPELSFTVTVPEKKKPPSPIKPKIPLSAPRKNNTNSVKY [ 188 ]  
MusFGF5 VST-----HFLPRFKQSEQPELSFTVTVPEKKKPP----- [ 167 ]  
MusFGF6 TVT-----HFLPRI----- [ 139 ]  
HsFGF6 TVT-----HFLPRI----- [ 139 ]  
HsFGF4 KVT-----HFLPRL----- [ 139 ]  
GgFGF4 TVT-----HFLPRI----- [ 139 ]  
Ci456 QSA-----HWLARTVTDKKS----- [ 154 ]  
BombyxviralFGF KFSVYAMTLLKRLSFPIYTSCPNIKNETIVQHRKCH----- [ 170 ]  
Dmebranchless KLS-----TYTNAITETVPOERVEQLIAKNFGANRVKHGVRQLCDTGGKPLIELIDV [ 187 ]  
XlFGF41 TLT-----HFLPRI----- [ 139 ]  
XlFGF20 KFT-----HFLPRPVDPEKVPELYKDLMGYS----- [ 159 ]  
MusFGF20 KFT-----HFLPRPVDPERVPELYKDLLMYT----- [ 161 ]  
HsFGF20 KFT-----HFLPRPVDPERVPELYKDLLMYT----- [ 161 ]  
GgFGF9 KFT-----HFLPRPVDPEKVPELYKDILSOS----- [ 161 ]  
HsFGF9 KFT-----HFLPRPVDPKVPELYKDILSOS----- [ 161 ]  
MusFGF9 KFT-----HFLPRPVDPKVPELYKDILSOS----- [ 161 ]  
GgFGF16s KFT-----HFLPRPVDPAKIPAVYRDLFHYR----- [ 160 ]  
RatFGF16 KFT-----HFLPRPVDPSKLPMSRDLFRYR----- [ 160 ]  
MusFGF16 KFT-----HFLPRPVDPSKLPMSRDLFRYR----- [ 160 ]  
HsFGF16 KFT-----HFLPRPVDPSKLPMSRDLFHYR----- [ 160 ]  
Ci91620 RHS-----QFLPRNIDTDKVNLYSGRLY----- [ 157 ]  
Cs91620 RHS-----QFLPRNINVDRVKELYMGRLY----- [ 157 ]  
Ci371020 SSA-----HFLPLP----- [ 149 ]  
MusFGF3 KSS-----LFLPRVLGHKDHMVRLLOSSQPRAPGEGSQPRORRQKQSPGDHGKM [ 195 ]  
GgFGF3 KSS-----LFLPRVLDKDHMVRLFHTNVRYRESLLKPPSKNQRRRRGR----- [ 190 ]  
XlFGF3 KSS-----LFLPRVLDNKDHDVRLFHTNAVYRESILKPSKPSGRQRRGO----- [ 190 ]  
MusFGF23 VRP-----RRHTRSAEDPPERDPLNVLKPRPRA--TPVPVSCSRELPSAEEGGPAASD [ 199 ]  
HsFGF23 PIP-----RRHTRSAEDDSEDPDPLNVLKPRARM--TPAPASCSQELPSAEDNSPMASD [ 200 ]

|               |                                                             |         |
|---------------|-------------------------------------------------------------|---------|
| MusFGF21      | DQA-----GFLPPEPPDVGSSDPLSMVEPLOGR-SPSYAS-----               | [ 180 ] |
| HsFGF21       | EPP-----GILAPQPPDVGSSDPLSMVGPSQGR-SPSYAS-----               | [ 181 ] |
| RatFGF22      | LST-----HFLPVLVSS-----                                      | [ 145 ] |
| MusFGF22      | LST-----HFLPVLVSS-----                                      | [ 145 ] |
| MusFGF7       | KTA-----HFLPMAIT-----                                       | [ 145 ] |
| HsKGF         | KTA-----HFLPMAII-----                                       | [ 145 ] |
| GgFGF7        | RAS-----HFLPLAIS-----                                       | [ 145 ] |
| XtropLOC      | KGS-----HFLPLSTS-----                                       | [ 145 ] |
| XtropFGF10    | TSA-----HFLPIVV-----                                        | [ 143 ] |
| GgFGF10       | TSA-----HFLPMVMS-----                                       | [ 145 ] |
| HsFGF10       | TSA-----HFLPMVHS-----                                       | [ 145 ] |
| GgFGF19       | GEYGDYSQAFEPEVYSSPLETDSMDPFGITSKLSPVKSPSFQK-----            | [ 187 ] |
| HsFGF19       | RGH-----LESDFSSPLETDSMDPFLVTGLEAVRSPSFQK-----               | [ 180 ] |
| DrFGF2        | KAI-----LFLPMSAKC-----                                      | [ 144 ] |
| HsFGF2        | KAI-----LFLPMSAKS-----                                      | [ 144 ] |
| MusFGF2       | KAI-----LFLPMSAKS-----                                      | [ 143 ] |
| GgFGF1        | KAI-----LFLPLPVSAD-----                                     | [ 146 ] |
| HsFGF1        | KAI-----LFLPLPVSS-----                                      | [ 145 ] |
| MusFGF1       | KAI-----LFLPLPVSSD-----                                     | [ 146 ] |
| DrFGF1        | KAI-----FFLPROVEQEED-----                                   | [ 147 ] |
| CsFGF1114     | PCS-----HFIPRPIEVQMFKEPSVCELAVPSRSASSTDARKRKT-----          | [ 176 ] |
| CiFGF1114     | PCT-----HFIPRPIEVRMFKEPSICELAAPSRSVSSSDNKKRKNL-----         | [ 177 ] |
| Dmepyramus    | KKA-----ILFFFPLNEEKFNHLHLAEVLSS-----                        | [ 141 ] |
| Dmethisbe     | ACY-----MFNKIEAEQFFRHHHNNGNS-----                           | [ 156 ] |
| ApisMGC84348  | KSI-----QFLAIRQE-----                                       | [ 144 ] |
| Celegl17      | AES-----EKSVCSTPPKPKLSPSPLEHSSFVHHAVRSNFLKKVSATHDSLRYRTMKSR | [ 198 ] |
| SpurpXP787124 | KKAQ-----FIPLVPPEELL-----                                   | [ 154 ] |
| HsFGF11       | AAA-----HFLPKLLEVAMYQEPSLHSVPEASPS-----SPPAP-----           | [ 170 ] |
| MusFGF11      | AAA-----HFVPKLLLEVAMYREPSLHSVPEASPS-----SPPAH-----          | [ 170 ] |
| CelLET756     | KAS-----HFLVVHHDLDRLRSPVNGNDVTDLVVASLFHQPPSHP-----          | [ 187 ] |
| RatFGF11      | AAA-----HFVPKLLLEVAVYREPSLHSVPEASPS-----SPPAH-----          | [ 170 ] |
| MusFGF13      | PAA-----HFLPKPLKVAMYKEPSLHDLTEFSRSGSGTPTKRSRSVSGVLNNGGKSMS  | [ 186 ] |
| GgFGF13       | PAA-----HFLPKPLKVAMYKEPSLHDLTEFSRSGSGTPTKRSRSVSGVLNNGGKSMS  | [ 179 ] |
| HsFGF13       | PAA-----HFLPKPLKVAMYKEPSLHD-----                            | [ 157 ] |
| XlFGF13       | PAA-----HFLPKPLKVAMYKEPSLHDLTEFSRSGSGTPTKRSRSVSGVLNNGGKSMS  | [ 186 ] |
| HsFGF12       | PSS-----HFVPKPIEVCMYREPSLHEIGEKGQR-----SRKSSGHHHDGGKLV----- | [ 174 ] |
| Cilarge       | FSN-----ESPSFSEVQPTPESSLRVTEQGEISAVAATDSPATSSRKNGKTSPVQRPD  | [ 204 ] |
| GgFGF11B      | PSS-----HFVPKPIEVCMYREPSLHEIGEKGQR-----SRKSSGTPTMNGGKVVN    | [ 177 ] |
| RatFGF12      | PSS-----HFVPKPIEVCMYREPSLHEIGEKGQR-----SRXSSGTPTMNGGKVVN    | [ 182 ] |
| MusFGF12A     | PSS-----HFVPKPIEVCMYREPSLHEIGEKGQR-----SRKSSGTPTMNGGKVVN    | [ 182 ] |
| GgFGF41A      | PAA-----HFLPKPLEVAMYREPSLHDIGETVPKAGVTPSKSTSASAIMNNGGKPPV   | [ 186 ] |
| HsFGF14       | PAA-----HFLPKPLEVAMYREPSLHDVGETVPKPGVTPSKSTSASAIMNNGGKPV    | [ 185 ] |
| RatFGF14      | PAA-----HFLPKPLEVAMYREPSLHDVGETVPKAGVTPSKSTSASAIMNNGGKPV    | [ 185 ] |
| MusFGF14      | PAA-----HFLPKPLEVAMYREPSLHDVGETVPKAGVTPSKSTSASAIMNNGGKPV    | [ 157 ] |
| GgFGF14       | PAA-----HFLPKPLEVAMYREPSLHDIGETVPKAGVTPSKSTSASAIMNNGGKPPV   | [ 187 ] |
| HsFGF14IB     | PAA-----HFLPKPLEVAMYREPSLHDVGETVPKPGVTPSKSTSASAIMNNGGKPV    | [ 186 ] |
| MusFGF14b     | PAA-----HFLPKPLEVAMYREPSLHDVGETVPKAGVTPSKSTSASAIMNNGGKPV    | [ 186 ] |
| Ci81718       | DEMFIKCTASSGMVNPNTAASNEKYKWIIGEFERDVKRHNKKKKRAPLSVLRPNYSVT- | [ 185 ] |
| Cs817182      | VET-----MFLKRPIETFG-----YPSGAPVTDDSRFGEIARAMIK-----         | [ 164 ] |
| Cs817181      | VET-----MFLKRPIETFG-----YPSGAPVTDDSRFGEIARAMIKQIRGHPRR      | [ 149 ] |
| RatFGF8       | REV-----HFMKRLPRGHH-----TTEQSLRFEFNLNYPFTRSLRGSQRTWAPEPR-   | [ 176 ] |
| MusFGF8       | REV-----HFMKRLPRGHH-----TTEQSLRFEFNLNYPFTRSLRGSQRTWAPEPR-   | [ 179 ] |
| GgFGF8        | REV-----HFMKRLPKGHQ-----TTEPHRRFEFLNYPFNRRSKRTRNSSASLRP--   | [ 178 ] |
| XlFGF8        | REV-----HFMKRLPKGHH-----TTEPHKRFEFINYPFNRRSKRTRYSSSR-----   | [ 175 ] |
| HsFGF17       | REA-----HFIKRLYQQLPFPNHAEKQKQFQFVGSAPTRRTKRTRRPQPL-----     | [ 178 ] |
| MusFGF17      | REA-----HFIKRLYQQLPFPNHAERQKQFQFVGSAPTRRTKRTRRPQSQ-----     | [ 178 ] |
| HsFGF18       | QDV-----HFMKRYPKGQP-----E-LQKPFKYTTVTKRSRRIPTHP-----        | [ 169 ] |
| MusFGF18      | QDV-----HFMKRYPKGQA-----E-LQKPFKYTTVTKRSRRIPTHP-----        | [ 169 ] |

|                |        |         |
|----------------|--------|---------|
| NvFGF1D        | -----  | [ 118 ] |
| NvFGF8A        | -----  | [ 137 ] |
| NvFGF1B        | -----  | [ 151 ] |
| NvFGF1E        | -----  | [ 112 ] |
| Nv247007       | -----  | [ 139 ] |
| NvFGF1C        | -----  | [ 161 ] |
| NvFGF1A        | -----  | [ 145 ] |
| Nv208072       | -----  | [ 153 ] |
| Nv211797       | -----  | [ 156 ] |
| NvFGF8B        | -----  | [ 134 ] |
| Nv204532       | -----  | [ 139 ] |
| Nv212165       | -----  | [ 171 ] |
| Nv244903       | -----  | [ 184 ] |
| HsFGF5         | RLKFRF | [ 194 ] |
| MusFGF5        | -----  | [ 167 ] |
| MusFGF6        | -----  | [ 139 ] |
| HsFGF6         | -----  | [ 139 ] |
| HsFGF4         | -----  | [ 139 ] |
| GgFGF4         | -----  | [ 139 ] |
| Ci456          | -----  | [ 154 ] |
| BombyxviralFGF | -----  | [ 170 ] |
| Dmebranchless  | ARFKAP | [ 193 ] |
| XlFGF41        | -----  | [ 139 ] |
| XlFGF20        | -----  | [ 159 ] |
| MusFGF20       | -----  | [ 161 ] |
| HsFGF20        | -----  | [ 161 ] |
| GgFGF9         | -----  | [ 161 ] |
| HsFGF9         | -----  | [ 161 ] |
| MusFGF9        | -----  | [ 161 ] |
| GgFGF16s       | -----  | [ 160 ] |
| RatFGF16       | -----  | [ 160 ] |
| MusFGF16       | -----  | [ 160 ] |
| HsFGF16        | -----  | [ 160 ] |
| Ci91620        | -----  | [ 157 ] |
| Cs91620        | -----  | [ 157 ] |
| Ci371020       | -----  | [ 149 ] |
| MusFGF3        | E----- | [ 196 ] |
| GgFGF3         | -----  | [ 190 ] |
| XlFGF3         | -----  | [ 190 ] |
| MusFGF23       | PLGVLR | [ 205 ] |
| HsFGF23        | PLGVVR | [ 206 ] |
| MusFGF21       | -----  | [ 180 ] |
| HsFGF21        | -----  | [ 181 ] |
| RatFGF22       | -----  | [ 145 ] |
| MusFGF22       | -----  | [ 145 ] |
| MusFGF7        | -----  | [ 145 ] |
| HsKGF          | -----  | [ 145 ] |
| GgFGF7         | -----  | [ 145 ] |
| XtropLOC       | -----  | [ 145 ] |
| XtropFGF10     | -----  | [ 143 ] |
| GgFGF10        | -----  | [ 145 ] |
| HsFGF10        | -----  | [ 145 ] |
| GgFGF19        | -----  | [ 187 ] |
| HsFGF19        | -----  | [ 180 ] |
| DrFGF2         | -----  | [ 144 ] |
| HsFGF2         | -----  | [ 144 ] |
| MusFGF2        | -----  | [ 143 ] |



|               |        |       |
|---------------|--------|-------|
| GgFGF1        | -----  | [146] |
| HsFGF1        | -----  | [145] |
| MusFGF1       | -----  | [146] |
| DrFGF1        | -----  | [147] |
| CsFGF1114     | -----  | [176] |
| CiFGF1114     | -----  | [177] |
| Dmepyrampus   | -----  | [141] |
| Dmethisbe     | -----  | [156] |
| ApisMGC84348  | -----  | [144] |
| Celegl17      | KS---- | [200] |
| SpurpXP787124 | -----  | [154] |
| HsFGF11       | -----  | [170] |
| MusFGF11      | -----  | [170] |
| CelLET756     | -----  | [187] |
| RatFGF11      | -----  | [170] |
| MusFGF13      | HNEST- | [191] |
| GgFGF13       | QNEST- | [184] |
| HsFGF13       | -----  | [157] |
| XlFGF13       | QNDST- | [191] |
| HsFGF12       | -----  | [174] |
| Cilarge       | SQQRKK | [210] |
| GgFGF11B      | QDST-- | [181] |
| RatFGF12      | QDST-- | [186] |
| MusFGF12A     | QDST-- | [186] |
| GgFGF41A      | NKSKTT | [192] |
| HsFGF14       | NKSKTT | [191] |
| RatFGF14      | NKCKTT | [191] |
| MusFGF14      | NKCKTT | [163] |
| GgFGF14       | NKSKTT | [193] |
| HsFGF14IB     | NKSKTT | [192] |
| MusFGF14b     | NKCKTT | [192] |
| Ci81718       | -----  | [185] |
| Cs817182      | -----  | [164] |
| Cs817181      | KHSRAF | [155] |
| RatFGF8       | -----  | [176] |
| MusFGF8       | -----  | [179] |
| GgFGF8        | -----  | [178] |
| XlFGF8        | -----  | [175] |
| HsFGF17       | -----  | [178] |
| MusFGF17      | -----  | [178] |
| HsFGF18       | -----  | [169] |
| MusFGF18      | -----  | [169] |

;  
END;
