# Supplementary material
Source: PubMed Central journal article supplement (PMC4580332)
Supplement: NIHMS41198-supplement-SFig8.pdf [file NIHMS41198-supplement-SFig8.pdf]

#NEXUS  
[!Created by MacVector on Oct 23 2006 at 11:42:15.]

BEGIN DATA;  
DIMENSIONS NTAX=24 NCHAR=399;  
FORMAT MISSING=X GAP=- INTERLEAVE DATATYPE=PROTEIN;

MATRIX

|                        |                                                               |      |
|------------------------|---------------------------------------------------------------|------|
| Podocoryne_VEGFR       | QSSELPHYDMDWEFPRSKISLIKTLGSGAFGQVWLAEAEGIHGFKPRDKSSSASKRRKSFQ | [60] |
| NvFGFR3                | SEIELPLDEEWELDRSQISLLGILGEGAFGRVVKADAIGLPN-----               | [42] |
| NvFGFR4                | -PATLPVP-CQVIPTSNIILHEYLGSGEFGVVTRGEMTTDDG-----               | [40] |
| Mus_FGFR3              | SELELPADPKWELSRRLTLGKPLGEGCFGQVVMMAEAIGIDK-----               | [42] |
| Gallus_FGFR3           | SELELPDPKWEELARSRLTLGKPLGEGCFGQVVMMAEAIGIDK-----              | [42] |
| XLaevisMGC80912        | SELGLPLDPKWELLRSRLTLGKPLGEGCFGQVVMMAEAIGIDK-----              | [42] |
| Xlaevis_FGFR4          | MEVELPLDAKWEFPRDRLVVGKPLGEGCFGQVVRAEYGYIDK-----               | [42] |
| Xlaevis_FGFR1          | SEYELPEDPRWEVARDRLILGKPLGEGCFGQVVMMAEAIGLDK-----              | [42] |
| NvFGFR1                | DFYELPIDEDWEIDRSQITIKEQLGEGAFGLVMKAEALGLTD-----               | [42] |
| Homo_FGFR2             | SEYELPEDPKWEFPRDKLTLGKPLGEGCFGQVVMMAEAVGIDK-----              | [42] |
| Danio_FGFR2            | PEYDLPEDPRWEFSRDKLTGKPLGEGCFGQVVMMAEALGIDK-----               | [42] |
| Homo_FGFR1             | SEYELPEDPRWELPRDRLVVGKPLGEGCFGQVVLAEAIGLDK-----               | [42] |
| Danio_FGFR4            | MEFELPYDPDWEFPRENLTGKPLGEGCFGQVVRAEAYGINK-----                | [42] |
| Mus_FGFR4              | VNLDLPLDPLWEFPRDRLVVGKPLGEGCFGQVVRAEAFQVVRA-----              | [44] |
| Apis_XP_3966492        | SEYELPVDSAWELPREHLTLGNTLGEAFGKVVRAQTNTGKP-----                | [42] |
| Ciona_FGFR             | IEINIQPDLQWELKREDILLHERIDEGFFGQVFRADLIRCAG-----               | [42] |
| AnophelesXP_5628661    | SEYEFPIDLNWEFPRNKLHLGKSLGEGMFGKVVMAEAHGLVK-----               | [42] |
| AnophelesXP_3127912    | SEYEFPIDLNWEFPRNKLHLGKSLGEGMFGKVVMAEAHGLVK-----               | [42] |
| Gallus_FGFR_XP_4144741 | VELDLPLDSKWEFPREKLVGKPLGEGCFGQVVRAEAYGIDR-----                | [42] |
| Drosophila_HTL         | NEYEFPLDSNWELPRSHLVLGATLGEAFGRVVMMAEVN-----                   | [38] |
| Drosophila_BTL         | NEYEFPLDSNWEI PRQQLSLGSILGEGAFGRVVMMAEAEG LPR-----            | [42] |
| Dros_p_GA20192PA       | NEYEFPLDSNWELPRGQLVVGATLGEAFGRVVMMAEVN-----                   | [38] |
| Celegans_EGL15         | SEYEVDSDPVWEVERSKLSLVHMLGEGAFGEVWKATYKETEN-----               | [42] |
| Danio_FGFR1            | SEYELPQDPRWEVQRDRLVVGKPLGEGCFGQVVMMAEAMGMDK-----              | [42] |

  

|                        |                                                                |       |
|------------------------|----------------------------------------------------------------|-------|
| Podocoryne_VEGFR       | KGQRRRYHSLRSIRYRKQLNVEEVTSLEKSMVAVKTLKDDAAEGEYKDLASELKILIH LGE | [120] |
| NvFGFR3                | -----MPYRCNVAVKMLN-----                                        | [55]  |
| NvFGFR4                | -----RTVDCAVKSIKGFASEEALRDLVQELELMHVS VGH                      | [74]  |
| Mus_FGFR3              | -----DRTAKPVTVAVKMLKDDATDKDLSDLVSEM EMMKMIGK                   | [80]  |
| Gallus_FGFR3           | -----DKPNKAITVAVKMLKDDATDKDLSDLVSEM EMMKMIGK                   | [80]  |
| XLaevisMGC80912        | -----ERPKNKPTVAVKMLKDDATDKDLSDLVSEM EMMKMIGK                   | [80]  |
| Xlaevis_FGFR4          | -----ERPEKPVTVAVKMLKDNGT DKDLSDLISEMELMKVIGK                   | [80]  |
| Xlaevis_FGFR1          | -----EKPNKVTKVAVKMLKSDASEKDLSDLI SEMEMMKMIGK                   | [80]  |
| NvFGFR1                | -----MPYRHTVAVKMLKADATENELADLLSEM DTMKNIGS                     | [78]  |
| Homo_FGFR2             | -----DKPKEAVTVAVKMLKDDATEKDLSDLVSEM EMMKMIGK                   | [80]  |
| Danio_FGFR2            | -----DKPKEAVTVAVKMLKDDATEKDLSDLVSEM EMMKMIGR                   | [80]  |
| Homo_FGFR1             | -----DKPNRVTKVAVKMLKSDATEKDLSDLI SEMEMMKMIGK                   | [80]  |
| Danio_FGFR4            | -----ENQDHMATVAVKMLKDDATDKDLADLI SEMELMKVMDK                   | [80]  |
| Mus_FGFR4              | -----EAFGMDP SRPDQTSVAVKMLKDNASDKDLADLVSEMEVMKLI GR            | [89]  |
| Apis_XP_3966492        | -----G--IPC VVAVKMLKEGHTDAEMMDLVSEM EMMKMIGK                   | [77]  |
| Ciona_FGFR             | -----GRKEKVDAAVKMLKSTRTEKMDL D L LTEM DQMKRVGK                 | [79]  |
| AnophelesXP_5628661    | -----G-HPSTVVAVKMLKEGHTDADVKDLVCEMEVMKMIGK                     | [78]  |
| AnophelesXP_3127912    | -----G-HPSTVVAVKMLKEGHTDADVKDLVCEMEVMKMIGK                     | [78]  |
| Gallus_FGFR_XP_4144741 | -----QWPDRAVTVAVKMLKDNATDKDLADLI SEMEMMKLMDK                   | [80]  |
| Drosophila_HTL         | -----NAIVAVK MVKEGHTDDDDIASLVREMEVMKII GR                      | [71]  |
| Drosophila_BTL         | -----SPQLAETIVAVK MVKEHTDTDMASLVREMEVMKMIGK                    | [80]  |
| Dros_p_GA20192PA       | -----SAIVAVK MVKEGHTDDDDIASLVREMEVMKII GR                      | [71]  |
| Celegans_EGL15         | -----NEI AVAVK K LKMSAHEKELIDL VSEMETF KVI GE                  | [76]  |
| Danio_FGFR1            | -----EKPNRITKVAVKMLKSDATEKDLSDLI SEMEMMKII GR                  | [80]  |

Podocoryne\_VEGFR HKNIVNLLGACTTNGKLYVILECCPRGNLLTFLRGKRETFQPVWTKYDMDMEN----- [173]  
NvFGFR3 -----GPLFVVVEYASQGNLRQFLRARRPIPEYANPLTEPPREK----- [94]  
NvFGFR4 HRNLLNLLIGACTDSEKLMIIVEFANDGCLLDLLHQARGDLQSPRIYQNIIEPRHS----- [128]  
Mus\_FGFR3 HKNIINLLGACTQGGPLYVVLVEYAAKGNLREFLRARRPPGMDYSFDAC---RLP----- [131]  
Gallus\_FGFR3 HKNIINLLGACTQDGPLYVVLVEYASKGNLREYLRRARRPPGMDYSFDTC---KLP----- [131]  
XLaevisMGC80912 HKNIINLLGACTQDGPLYVVLVEYASKGNLREYLKARRPPGMDYSFDTC---KIP----- [131]  
Xlaevis\_FGFR4 HKNIINLLGVCTQEGPLFVIVEYASKGNLREFLRARRPPTPEDAFDIT---KVP----- [131]  
Xlaevis\_FGFR1 HKNIINLLGACTQDGPLYVIVEYTSKGNLREYLRRARRPPAMEYCYNPT---CVP----- [131]  
NvFGFR1 HKNIINLLIGARTQNGPLYVVVEFAPHG NLRQFLRERRPSDYHRSRSDSSTHSQP----- [132]  
Homo\_FGFR2 HKNIINLLGACTQDGPLYVIVEYASKGNLREYLRRARRPPGMEYSYDIN---RVP----- [131]  
Danio\_FGFR2 HKNIINLLGACTQDGPLYVIVEYASKGNLREYLRRARRPPGMEYSYDIA---RVS----- [131]  
Homo\_FGFR1 HKNIINLLGACTQDGPLYVIVEYASKGNLREYLQARRPPGLEICYNPS---HNP----- [131]  
Danio\_FGFR4 HKNIINLLGVCTQDGPLYVVLVEYASKGSLREYLRRARRPPGMDYTFDVT---KVP----- [131]  
Mus\_FGFR4 HKNIINLLGVCTQEGPLYVIVECAAKGNLREFLRARRPPGPDLSPDGP---RSS----- [140]  
Apis\_XP\_3966492 HVNIINLLGACTQGGPLYVVVEFAPHG NLRDFLRDHRPSSGYEPTIGQ---EPK----- [128]  
Ciona\_FGFR HKNIVNLLGVCTQNGILWLVTVEYAQKGNLRDYLRNRPSSELQYELSTP---DSPAP---- [132]  
AnophelesXP\_5628661 HVNIINLLGCCCKDGPLYVIVEYAPHG NLRK NFLRSHRFGSNYEATNEK---EKK----- [129]  
AnophelesXP\_3127912 HVNIINLLGCCCKDGPLYVIVEYAPHG NLRK NFLRSHRFGSNYEATNEK---EKK----- [129]  
Gallus\_FGFR\_XP\_4144741 HKNIINLLGVCTQDGPLYVIVEFAAKGNLREYLRRARRPPMPDYTFDIT---ELH----- [131]  
Drosophila\_HTL HINIINLLGCCSQNGPLYVIVEYAPHG NLRKDFLYK NRPFGRDQDRDSS---QPPS---- [124]  
Drosophila\_BTL HINIINLLGCCSQGGPLWVIVEYAPHG NLRKDFLQNRPGAPQRRSDSDGYLDDKPL---- [136]  
Dros\_p\_GA20192PA HINIINLLGCCSQSGPLYVIVEYAPHG NLRKDFLYK NRPFGREQ---VDSS---QPPS---- [123]  
Celegans\_EGL15 HENVLRLLIGCCTGAGPLYVVVELCKHG NLRDFLRAHRPKEEKAKKSSQELTDYLEPRKAS [136]  
Danio\_FGFR1 HKNIINLLGACTQDGPLYVIVEFAAKGNLREYLRRARRPPGMEYCYNPD---QVP----- [131]

Podocoryne\_VEGFR -----EFTYIDLMMIVIQVAKRMDFLQSQKCVHRDLAARNVLVGPDYIMKIADFGL [224]  
NvFGFR3 -----LKLVDLVSFSYQVARGMEYLESKCCIHRDLAARNVLVSDNHVIKIADFGL [144]  
NvFGFR4 -----EVVLGQTRRLEIALDVAQGM DY LASKRCVHRDLAARNVLIADG-VAKVADFGL [180]  
Mus\_FGFR3 -----EEQLTCKDLVSCAYQVARGMEY LASQKCIHRDLAARNVLVTEEDNVMKIADFGL [184]  
Gallus\_FGFR3 -----EEQLTFKDLVSCAYQVARGMEY LASQKCIHRDLAARNVLVTEEDNVMKIADFGL [184]  
XLaevisMGC80912 -----AEQLTFKDLVSCAYQVARGMEY LASQKCIHRDLAARNVLVTD D D I V M K I A D F G L [184]  
Xlaevis\_FGFR4 -----EELLSFKDLVSCAYQVARGMEY LESKRCIHRDLAARNVLV A E D N V M K I A D F G L [184]  
Xlaevis\_FGFR1 -----DQLLSFKDLVSCAYQVARGM DY LASKKCIHRDLAARNVLVTEEDNIMKIADFGL [184]  
NvFGFR1 -----SLIVRDFISFAFQIARGMEYLSFKKCIHRDLAARNILVGEDYV M K I A D F G L [183]  
Homo\_FGFR2 -----EEQMTFKDLVSCYTYQLARGMEY LASQKCIHRDLAARNVLVTEENNVMKIADFGL [184]  
Danio\_FGFR2 -----DEPLTFKDLVSCYTYQVARGMEY LASQKCIHRDLAARNVLVTEESNVMKIADFGL [184]  
Homo\_FGFR1 -----EEQLSSKDLVSCAYQVARGMEY LASKKCIHRDLAARNVLVTEEDNVMKIADFGL [184]  
Danio\_FGFR4 -----EEQLTFKDLVSCAYQVARGMEY LASKRCIHRDLAARNVLVTEEDNVMKIADFGL [184]  
Mus\_FGFR4 -----EGPLSFPALVSCAYQVARGM QY LESRCCIHRDLAARNVLVTEEDVMKIADFGL [193]  
Apis\_XP\_3966492 -----EKKTLTQKDLVSFAVQVARGMEY LASRCCIHRDLAARNVLVSD EY V L K I A D F G L [182]  
Ciona\_FGFR -----PRDEPLTLRALMSASHQVARGMEYLSQKCCIHRDLAARNVLVANDFVMKIADFGL [187]  
AnophelesXP\_5628661 -----ILTQKELISFAFYQIARGMEHLASRCCIHRDLAARNILVSDNYVMKIADFGL [180]  
AnophelesXP\_3127912 -----ILTQKELISFAFYQIARGMEHLASRCCIHRDLAARNILVSDNYVMKIADFGL [180]  
Gallus\_FGFR\_XP\_4144741 -----EEQLCFKDLVSCVYQVARGMEY LESRCCIHRDLAARNVLVTAENVMKIADFGL [184]  
Drosophila\_HTL -----PPAHVITEKDLIKFAHQIARGM DY LASRCCIHRDLAARNVLVSDDYVLKIADFGL [179]  
Drosophila\_BTL -----ISTQHLGEKELTKFAFQIARGMEY LASRCCIHRDLAARNVLVSDGYVMKIADFGL [191]  
Dros\_p\_GA20192PA -----PPAHVITEKDLIKFAHQIARGM DY LASRCCIHRDLAARNVLVSDDYVLKIADFGL [178]  
Celegans\_EGL15 DKDDIELIPNLTQRHLVQFAVQVAQGMNFLASKKIIHRDLAARNVLVGDGHV L K I S D F G L [196]  
Danio\_FGFR1 -----VENMSIKDLVSCAYQVARGMEY LASKKCIHRDLAARNVLVTEEDNVMKIADFGL [184]

Podocoryne\_VEGFR ARDIYKDEFY LKETTGLLPVKWMAPESLFDK VYTSMSDIWSYGIVLWEAFTLGGSPYPGL [284]  
NvFGFR3 ARDIHDIDYYRKT TDGRLPVKWMAL EALFDRVYTAQSDVWAYGILMWEIVTFGGSPYPGI [204]  
NvFGFR4 SRNIYETGEYEKTTTRGKLPTRWMSLESLETRKFTLES DVVSYGVLLWEIETRGLTPNAGL [240]  
Mus\_FGFR3 ARDVHNL DYYKTTNGRLPVKWMAPEALFDRVYTHQSDVVSFGVLLWEI FT LGGSPYPGI [244]  
Gallus\_FGFR3 ARDVHNI DYYKTTNGRLPVKWMAPEALFDRVYTHQSDVVSFGVLLWEI FT LGGSPYPGI [244]  
XLaevisMGC80912 ARDIHNIDYYKTTNGRLPVKWMAPEALFDRIYTHQSDVVSYG VLLWEI FT LGGSPYPGI [244]  
Xlaevis\_FGFR4 ARGVHDIDYYKTTNGRLPVKWMAPEALFDRVYTHQSDIWSFGVLTWEI FT LGGSPYPGI [244]

Xlaevis\_FGFR1 ARDIHHIDYYKTTNGRLPVKWMapeALFDRIYTHQSDVWSFGVLLWEIftLGGSPYPGV [244]  
NvFGFR1 ARNVRDMDYYRKATDGRLPIKWLAIeALFDRVYTTQSDVWTFGILLWEIftLGGSPYPGI [243]  
Homo\_FGFR2 ARDINNIDYYKTTNGRLPVKWMapeALFDRVYTHQSDVWSFGVLMWEIftLGGSPYPGI [244]  
Danio\_FGFR2 ARDVHNIDYYKTTNGRLPVKWMapeALFDRVYTHQSDVWSFGVLMWEIftLGGSPNPGI [244]  
Homo\_FGFR1 ARDIHHIDYYKTTNGRLPVKWMapeALFDRIYTHQSDVWSFGVLLWEIftLGGSPYPGV [244]  
Danio\_FGFR4 ARGVHQIDYYKTTNGRLPVKWMapeALFDRVYTHQSDVWSFGVLMWEIftLGGSPYPGI [244]  
Mus\_FGFR4 ARGVHHIDYYKTTNGRLPVKWMapeALFDRVYTHQSDVWSFEILLWEIftLGGSPYPGI [253]  
Apis\_XP\_3966492 ARDIHCHDYYRKTTDGRLPVKWMapeALFHRVYTTQSDVWSYGILLWEIMTLGGTPYPSV [242]  
Ciona\_FGFR ARDIRSNDYYRKETRGLHPYKWMaleAMTDNMFTTHATDVWSFGILLWEIFSLGGSPYPGV [247]  
AnophelesXP\_5628661 ARDIHQEYYRKTtTGKLPiRWMApeSLEEKfyDSQSDVWSFGVLLWEIMTLGGNPYPSI [240]  
AnophelesXP\_3127912 ARDIHQEYYRKTtTGKLPiRWMApeSLEEKfyDSQSDVWSFGVLLWEIMTLGGNPYPSI [240]  
Gallus\_FGFR\_XP\_4144741 ARDVHDIIDYYKTTNGRLPVKWMapeALFERVYTHQSDVWSFGILMWEIftLGGSPYPGI [244]  
Drosophila\_HTL ARDIQSTDYRKNtNGRLPIKWMapeSLQEKfyDSKSDVWSYGILLWEIMTYGQQPYPTI [239]  
Drosophila\_BTL ARDIQDTEYYRKNtNGRLPIKWMapeSLQEKfyDSQSDVWSYGILLWEIMTYGDQPYPHI [251]  
Dros\_p\_GA20192PA ARDIQSTTEYYRKNtNGRLPIKWMapeSLQEKfyDSKSDVWSYGILLWEIMTFGAQPYPTI [238]  
Celegans\_EGL15 SRDVHCNDYYRKRNGRLPIKWMaleALDSNVYTVESDVWSYGILLWEIMTLGGTPYPTI [256]  
Danio\_FGFR1 ARDIHHIDYYKTTNGRLPVKWMapeALFDRIYTHQSDVWSFGVLLWEIftLGGSPYPGV [244]

Podocoryne\_VEGFR P-TEDLFGFLEDGKRmerPEICPKSVFEIMSDCWTkSPYDRPMFSQIYDRlTNVlKHNPV [343]  
NvFGFR3 P-LWKLfELLKEgyrMEQPVNCQDDVYALMLRCWHENPNQRPTFAEIVKEMDAKLTALSE [263]  
NvFGFR4 N-YREMIARYRkgyRLerPPDCDQGLYEIMRRCWLAIPKSRPTFSdIVEQLTEllLWTC-- [297]  
Mus\_FGFR3 P-VEELFKLLKEGHRMDKpASCTHdLYMIMRECWHAVPSQRPTFKQLVEDLDRILtVTST [303]  
Gallus\_FGFR3 P-VEELFKLLKEGHRMDKpANCTHdLYMIMRECWHAVPSQRPTFKQLVEDLDRVLTMTST [303]  
XlaevisMGC80912 P-VEELFKLLKEGHRMDKpANCTHELYMIMRECWHAVPSQRPTFKQLVEDLDRVLTVTST [303]  
Xlaevis\_FGFR4 P-VEELFKLLREGHRMDKpSNCTHELYMLMRECWHAVPSQRPTFKQLVEQLDRILtAVS- [302]  
Xlaevis\_FGFR1 P-MEELFKLLKEGHRMDKpTnCTNELYMMMKDCWHAMPSQRPTFNQLVEDLDRILALSSN [303]  
NvFGFR1 P-VEKLFELLKSGYRMQMPQKCPDKMYDImLSCWnENPNARPSfTELRAEFdKMLtSMTD [302]  
Homo\_FGFR2 P-VEELFKLLKEGHRMDKpANCTNELYMMMRDCWHAVPSQRPTFKQLVEDLDRILtLTn [303]  
Danio\_FGFR2 P-VEELFKLLKEGHRMDKpANCTNELYMMMKDCWHAISshRPTFKQLVEDLDRILtLATn [303]  
Homo\_FGFR1 P-VEELFKLLKEGHRMDKpSNCTNELYMMMRDCWHAVPSQRPTFKQLVEDLDRIVAlTSn [303]  
Danio\_FGFR4 P-VEELFKLLKEGHRMDKpSNCTHELYMKMRECWHAVPTQKQIQERSAYGCSEtRERHP- [302]  
Mus\_FGFR4 P-VEELFSLlREGHRMERPPNCPSELYGLMRECWHAAAPSQRPTFKQLVEALDKVLLAVS- [311]  
Apis\_XP\_3966492 PSVEKLFQllRtGHRMEKPPCCSIEIYLMRDCWSYQPNERPMfGELVEDLDRILtITAN [302]  
Ciona\_FGFR K-THDLVRFLRNGDRLEQPQfASSELYRLMRDCWEEsPRRRPQfRQLVEDLDRMLASSSS [306]  
AnophelesXP\_5628661 PTWdNlLEHLKKGKRMEKpPLCSIEIYLFMRECWHYRPEERPTfSEIVQHLDRlVSITSn [300]  
AnophelesXP\_3127912 PTWdNlLEHLKKGKRMEKpPLCSIEIYLFMRECWHYRPEERPTfSEIVQHLDRlVSITSn [300]  
Gallus\_FGFR\_XP\_4144741 P-VEDLFKLLKEGHRMDcPSNCTHEllGTGPSESDSLELYSPAHfPDLGEASEKLLKQ- [302]  
Drosophila\_HTL MSAEELYTYLMSGQRMEKpAKCSMNIYILMRQCWHfNADDRPPfTEIVEYMDKLLQTKED [299]  
Drosophila\_BTL LSAEELYSYLITGQRMEKpAKCSLNIYVVMRQCWHfESCARPTFAELVESfDGILQqASS [311]  
Dros\_p\_GA20192PA MSAEELYSYLMSGQRMEKpAKCSMNIYILMRQCWHfNADDRPPfTEIVEYMDKLLQAKED [298]  
Celegans\_EGL15 A-MPELYANLKEgyrMEPPHLCPQEVYHLmCSCWREKLEERPSFKtIVDYLDWMLtMTNE [315]  
Danio\_FGFR1 P-VEELFKLLKEGHRMDRPSCTHELYMMMRDCWHAVPSQRPTFKQLVEDLDRtLSMtsn [303]

Podocoryne\_VEGFR SD---SDYLDFTDAKENDYlTPDIKANSNEYLEASAENF [379]  
NvFGFR3 -----QEYLDLTSPLSNPVAPIETPPSSESSPTPRESLS [297]  
NvFGFR4 ----- [297]  
Mus\_FGFR3 -----DEYLDLSVPFEQYSPGGQDTPSSSSS-GDDSVFT [336]  
Gallus\_FGFR3 -----DEYLDLSVPFEQYSPAGQDTHSTCSS-GDDSVFA [336]  
XlaevisMGC80912 -----DEYLDLSVPFEQYSPAGQDSNStCSS-GDDSVFA [336]  
Xlaevis\_FGFR4 -----EEYLDLSMPFEQYSPCEDSAStCSSSDSVFA- [335]  
Xlaevis\_FGFR1 -----QEYLDLSMPVnQYSPCFPDtRSStCSSGEDSVFS [337]  
NvFGFR1 -----KEYLEILAKSVDHVAGEMEAPITDESdTnTDTFT [336]  
Homo\_FGFR2 -----EEYLDLSQPLEQYSPSPDTRSSCSS-GDDSVFS [336]  
Danio\_FGFR2 -----EEYLDLCAPVEQYSPSPDTRSSSSS-GDDSVFS [336]  
Homo\_FGFR1 -----QEYLDLSMPLDQYSPSPDTRStCSSGEDSVFS [337]  
Danio\_FGFR4 -----QQSEACGGEeEALQGSQEFi----- [322]  
Mus\_FGFR4 -----EEYLDLRLtFGPFSPSNGDASStCSSSD-SVFS- [343]

```

Apis_XP_3966492      -----EEYLDLGLPQLDTPPSSQESSEADDDEGEENAME [336]
Ciona_FGFR          -----LEYIDLNSPCEADYLPSDVDSNEDTESRDSANA- [339]
AnophelesXP_5628661 -----EEYLDLGLPQLETPPSSDDSDDDVEEDEEDCDDQ [334]
AnophelesXP_3127912 -----EEYLDLGLPQLETPPSSDDS----- [320]
Gallus_FGFR_XP_4144741 -----RKRKRPRHSSAAVHSKKEKNGERLG----- [327]
Drosophila_HTL      -----YLDVDIANLDTPPSTSDEEE-DETDNLQKWCN [330]
Drosophila_BTL      NPN--DAYLDLSMPMLETPPSSGDEDDGSDTETFRETSP [348]
Dros_p_GA20192PA    -----YLDVDIANLDTPPSTSDEED-AESD----- [322]
Celegans_EGL15      TIEGSQEFNDQFFSERSTASGPVSPMESFQKKRKRPLS [354]
Danio_FGFR1         -----QEYLDLSVSLDQFSPNFPDTRSSTCSSGEDSVFS [337]

```

```

;
END;

```
