# Supplementary material
Source: PubMed Central journal article supplement (PMC4580332)
Supplement: NIHMS41198-supplement-SFig9.pdf [file NIHMS41198-supplement-SFig9.pdf]

#NEXUS  
[!Created by MacVector on Oct 23 2006 at 11:47:53.]

BEGIN DATA;  
DIMENSIONS NTAX=19 NCHAR=164;  
FORMAT MISSING=X GAP=- INTERLEAVE DATATYPE=PROTEIN;

MATRIX

|                |                                                               |       |
|----------------|---------------------------------------------------------------|-------|
| Xtrop_spred2   | PSRCSRRK--DGERSRCIYCRDMFNHDENRRGQCQDAPDSVRNCIRRVS CMGFADCVLY  | [58]  |
| Homo_Spred2    | PSRGKSRRRKEDGERSRCVYCRDMFNHEENRRGHCQDAPDSVRTCIRRVS CMWCADSMLY | [60]  |
| NvSpry         | -PKYITSLPTTKLVSGVAEEKSKWADEECETRASGKVC GFDSEEVVDYATCMCCVKGLFY | [59]  |
| Spurp_spy2     | PPKKLMQKMNKYTEPAQCLHCSQYFDPERSRKGDCPEAPDEASYCINFCTCLCAAQCMLY  | [60]  |
| Danio_spy4     | -EKKKHVLLCEKCGKCRCTECLPR-TLPSCWVCNQECLCSAQNLVDSVTCMCLVKGVFY   | [58]  |
| Gallus_spy2    | --LGAHSYRCEDCGKCKCKECTYPR-TLPSCWICDKQCLCSAQNVVDYGTCCVCCVKGLFY | [57]  |
| Homo_Spy4      | -ELDKHFLLCEACGKCKCKEASPR-TLPSCWVCNQECLCSAQTLVNYGTCMCLVQGFY    | [58]  |
| Xtrop_spy1     | --YSQHRFICEQCGKCKCGDCTAPR-TLPSCWVCNQECLCSAQTLVNYGTCMCLVKATFY  | [57]  |
| homo_spy3      | -HPSEHLFICEECGRCKCVPCTAAR-PLPSCWLCNQRLCSAESLLDYGTCLCCVKGLFY   | [58]  |
| Mus_spy2       | --LGLHAYRCEDCGKCKCKECTYPR-PLPSDWICDKQCLCSAQNVVDYGTCCVCCVKGLFY | [57]  |
| Homo_spy1      | --LTQHKFICEQCGKCKCGECTAPR-TLPSCWVCNQECLCSAQNVVDYGTCCVCCVKGLFY | [57]  |
| Danio_spy2     | -PDGKHSILCEDCGRCKCEGCTCPR-TLPSCWMCGRRLCSATSAMDYVTCVCCVKCLFY   | [58]  |
| Xlaevis_spy2   | --LDLHSLMCEDCGKCKCKECTYPR-TLPSCWICDKQCLCSAQEVVDYGTCCVCCVKCLFY | [57]  |
| Mus_spy3       | -HSSDHLFICEECGRCKCVPCTAVR-PLPSCWMCNQRLCSAESLLDYGTCLCCVKGLFY   | [58]  |
| Xtrop_spy2     | --LGLHSLRCEDCGKCKCKECTYPR-TLPSCWICDKQCLCSAQEVVDYGTCCVCCVKCLFY | [57]  |
| Drosophila_spy | DPSLLNPIVPCRCGRRCQCSQSPR-PLPQTWVCNKTCLCSAESVIDYASCLCCAKALFY   | [59]  |
| Mus_spy4       | -ELDKHFLLCEACGKCKCKEASPR-TLPSCWVCNQECLCSAQTLVNYGTCMCLVQGFY    | [58]  |
| Homo_spy2      | --LGLHAYRCEDCGKCKCKECTYPR-PLPSDWICDKQCLCSAQNVVDYGTCCVCCVKGLFY | [57]  |
| Mus_spy1       | --PTQHKFICEQCGKCKCGECTAPR-ALPSCWVCNQECLCSAQNVVDYGTCCVCCVKGLFY | [57]  |
|                |                                                               |       |
| Xtrop_spred2   | HCMSDSE-GD-----YTD-ACSCDTSDEKFCRLRWMLLIPLSIIAPGMCCYLPLRACYN   | [109] |
| Homo_Spred2    | HCMSDPE-GD-----YTD-PCSCDTSDEKFCRLRWMLLIALSFLAPCMCCYLPLRACYH   | [111] |
| NvSpry         | HCTKDSEDEGS-----MADEPCSTGTP--ACVPRWGCLGLLALLMPCIWCYLPVAGCRK   | [111] |
| Spurp_spy2     | HCMSNSE-GD-----FPS-PCSCDTNESQFCRRWFGLAALSFIIVPCLWCYPPLKCCHW   | [111] |
| Danio_spy4     | HCTDEDEEGS-----CADKPCSCSHS--NCCARWSFMAAVSLVLPCLVLCYLPATGCAK   | [109] |
| Gallus_spy2    | HCSNDDE-DN-----CADNPCSCSQS--HCCTRWSAMGVVSLFLPCLWYLPKAGCLK     | [107] |
| Homo_Spy4      | HCTNEDDEGS-----CADHPCSCSRS--NCCARWSFMGALSVVLPCLLCYLPATGCVK    | [109] |
| Xtrop_spy1     | HCSNDDEGDS-----YADNPCSTQS--HCWSRYLCMGVMSFFLPCLLCYPPAKGCLK     | [108] |
| homo_spy3      | HCSTDDE-DN-----CADEPCSCGPS--SCFVRWAAMSLISLFLPCLCCYLPTRGCLH    | [108] |
| Mus_spy2       | HCSNDDE-DN-----CADNPCSCSQS--HCCTRWSAMGVMSLFLPCLWYLPKAGCLK     | [107] |
| Homo_spy1      | HCSNDDEGDS-----YSDNPCSCSQS--HCCSRYLCMGAMSLFLPCLLCYPPAKGCLK    | [108] |
| Danio_spy2     | HCSSDDE-DV-----CADKPFSTQS--HCCMRWSAISVLALFLPCLLCYLPKAGCVA     | [108] |
| Xlaevis_spy2   | HCSNDDE-DN-----CADNPCSCSQS--HCCTRWSAIGVMALFLPCLWYLPKAGCLK     | [107] |
| Mus_spy3       | HCSTDDE-DN-----CADEPCSCGPS--SCFIRWAAMSLISLFLPCLCCYLPTRGCLH    | [108] |
| Xtrop_spy2     | HCSNDDE-DN-----CADNPCSCSQS--HCCTRWSAIGVMALFLPCLWYLPKAGCLK     | [107] |
| Drosophila_spy | HCARDNDLDCDDGNGTPCVDNPCSCGPY--KRTQRWGWLGALSIFLPLWYWPMPRGCMK   | [117] |
| Mus_spy4       | HCTNEDDEGS-----CADHPCSCSGS--NCCARWSFMGALSVVLPCLLCYLPATGCVK    | [109] |
| Homo_spy2      | HCSNDDE-DN-----CADNPCSCSQS--HCCTRWSAMGVMSLFLPCLWYLPKAGCLK     | [107] |
| Mus_spy1       | HCSNDDDGGS-----YSDNPCSCSQS--HCCSRYLCMGALSLCLPCLLCYPPAKGCLK    | [108] |
|                |                                                               |       |
| Xtrop_spred2   | CGVMCGCCGGKHKAAAG-----                                        | [125] |
| Homo_Spred2    | CGVMCRCCGGKHKAAA-----                                         | [127] |
| NvSpry         | ACSSCKYKTRKQKRKEKLT-----                                      | [132] |
| Spurp_spy2     | LGTKCGCCGGRHKAK-----                                          | [126] |
| Danio_spy4     | LSQKCYDGVSRPGCRCKST-QSCKVAEIKACQ---PEKQAS---                  | [146] |
| Gallus_spy2    | LCQGCYDRVNRPGCRCKHS-NTVCCKVPSVP---PRNFEKPT--                  | [145] |
| Homo_Spy4      | LAQRGYDRLRRPGCRCKHT-NSVICKAASGDA---KTSRPDKPF                  | [149] |
| Xtrop_spy1     | LCRECYDRVNRPGCRCKNS-NTVYCKLDDVP---RGQGKPS--                   | [145] |
| homo_spy3      | LCQQGYDSLRRPGCRCKRHTNTVCRKISSGSAPFPKAQEK---                   | [149] |
| Mus_spy2       | LCQGCYDRVNRPGCRCKNS-NTVCCKVPTVP---PRNFEKPT--                  | [145] |

```
Homo_spy1      LCRRCYDWIHRPGCRCKNS-NTVYCKLESCPS---RGQGKPS-- [146]
Danio_spy2     LCQACYDCTSRPGCRCKN---KGVEK----- [131]
Xlaevis_spy2   LCQGCYDRVNRPGCQCKRS-NTVCLKVPHLQ---PRNLEKPT-- [145]
Mus_spy3       MCQQGYDSLRRPGCRCKRHTNTVCRKISSSSSPFKAQEKS--- [149]
Xtrop_spy2    LCQGCYDRVNRPGCRCKRS-NTVCLKVPHLQ---PRNLEKPT-- [145]
Drosophila_spy LCEKCYGRFAGRGCRGIGGGGAGSGGGVGSIGSTSSMLP--- [158]
Mus_spy4       LAQRGYDRLRRPGCRCKHT-NSVICKAASGDT---KTSRSDKPF [149]
Homo_spy2     LCQGCYDRVNRPGCRCKNS-NTVCKVPTVP---PRNFEKPT-- [145]
Mus_spy1      LCRGCYDWTHRPGCRCRNS-NTVYCKLESCPS---RAQGKLS-- [146]
```

```
;  
END;
```
