# Supplementary material
Source: PubMed Central journal article supplement (PMC4580332)
Supplement: NIHMS41198-supplement-SFig10.pdf [file NIHMS41198-supplement-SFig10.pdf]

#NEXUS  
[!Created by MacVector on Oct 23 2006 at 11:48:45.]

BEGIN DATA;  
DIMENSIONS NTAX=10 NCHAR=113;  
FORMAT MISSING=X GAP=- INTERLEAVE DATATYPE=PROTEIN;

MATRIX  
Rattus\_ChCh MCGDCVEKKYPNNGTCLENGSLNLFAGCAVCSKRDFMLITNRSLSKEEDGEEIIVTYDH- [59]  
Mus\_churchill MCGDCVEKEYPNRGTTCLENGSLNLFAGCAVCSKRDFMLITNRSLSKEEDGEEIIVTYDH- [59]  
Xenopus\_trop\_ChCh MCGGCVQEEYPDRGSTCLETGSLNLFVSCVQCNKRDFVLIVNKTAEEEDGEEIITYDHM [60]  
Xlaevis\_ChCh MCGGCVQOEYPDRGSTCLETGSLNLFVSCVQCNKRDFVLIVNKTAEEEDGEEIITYDHM [60]  
Danio\_ChCh MCTGCVQKQYPDRNGTCLENGSLMNFVGCANCHQRDFVLISDRMTVNEDEEEIIVTYLHM [60]  
Homo\_ChCh MCGDCVEKEYPNRGNTCLENGSLNLFVGCVCSKRDFMLITNKSLSKEEDGEEIIVTYDPD [60]  
Gallus\_ChCh MCGGCVGTEYPERGTTCLGGSLNLFVGCARCGRDFVLLGNRAAGLHGDDEIITYDH- [59]  
Homo\_My015 MCGDCVEKEYPNRGNTCLENGSLNLFVGCVCSKRDFMLITNKSLSKEEDGEEIIVTYDPD [60]  
Spurp\_ChCh MCGECVSKCPDRGNICLDNGSYILNFVGCARCGRDFVLLGNRAAGLHGDDEIITYDH- [60]  
NvChCh MCRDCVKQQLPDRGNMCLDNGSYLWVQCKEKGKDPVKIVDRQTTEDEDEGEETITYKH [60]

Rattus\_ChCh LCKNCHHVIARHEYTFSIMDEFQEYTMCLLCLCGKAEDTISILPDDPRQMLLF [112]  
Mus\_churchill LCKNCHHVVARHEYTFSIMDEFQEYTMCLLCLCGKAEDTISILPDDPRQMTLLF [112]  
Xenopus\_trop\_ChCh -CKNCHHVIKHEYTFSVVDYQYTMCLMCLCGRAEDSVSVLPDDPRQMAPLF [112]  
Xlaevis\_ChCh -CKNCHHVIKHEYTFSVVDYQYTMCLMCLCGRAEDSVSVLPDDPRQMAPLF [112]  
Danio\_ChCh -CKNCEHVIARHEYTFTVVDYQYTMCLMCLCGKAEDTISILPDDPRQTAPLF [112]  
Homo\_ChCh LCKNCHHVIARHEYTFSIMDEFQEYTMCLLCLCGKAEDTISILPDDPRQMTLLF [113]  
Gallus\_ChCh LCKNCHHLIARHEYTFSVVDYQYTMCLLCLCGRAEDSVSILPDDPRQMTPLF [112]  
Homo\_My015 LCKNCHHVIARHEYTFSIMDEFQEYTMCLLCLCAKPKIL-SVFS----LMTPK [108]  
Spurp\_ChCh KCTHCCHVIAEHEHTFSIEGEYQYAMCMLCGVSDTVSVLPVDPRKEMTLF [113]  
NvChCh ECVHCGHVVAEHEFTFR-VGDSQDYSMSCLLCLCGEGTDQRNIFPENQYRQNGVA [112]

;  
END;
