# Supplementary material
Source: PubMed Central journal article supplement (PMC4580332)

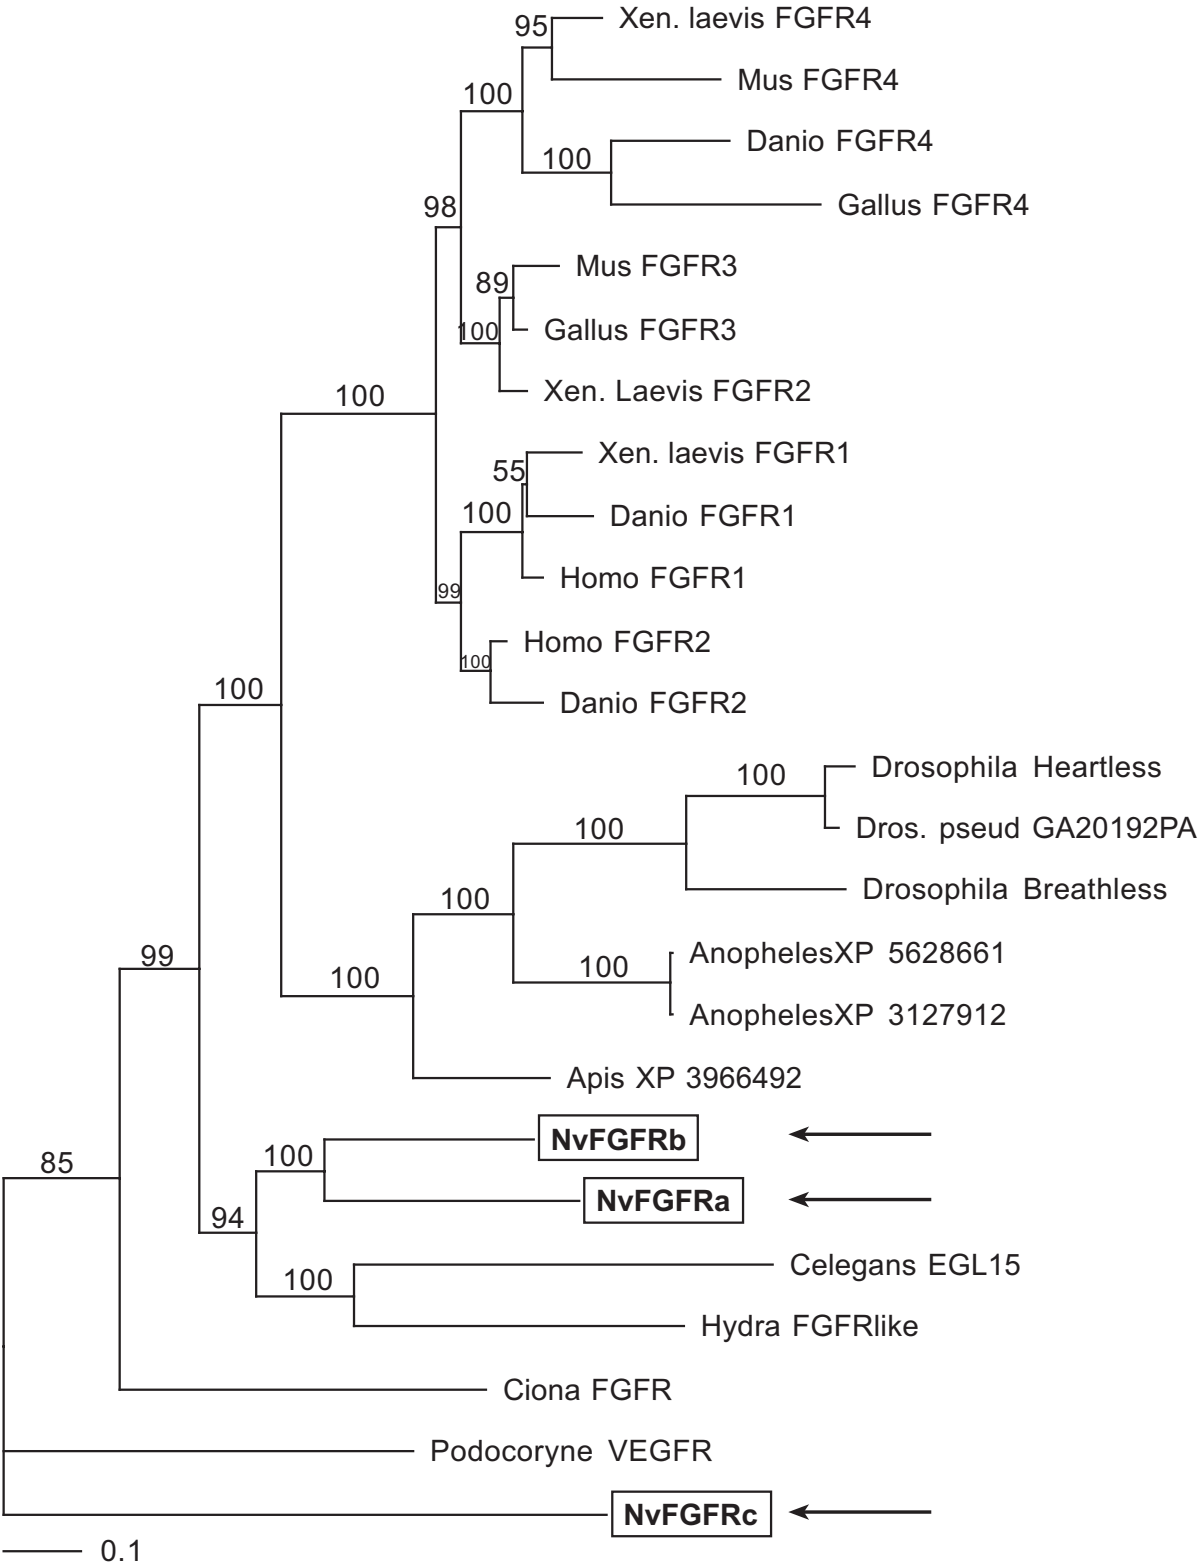

Supplement: NIHMS41198-supplement-SFig2.pdf [file NIHMS41198-supplement-SFig2.pdf]

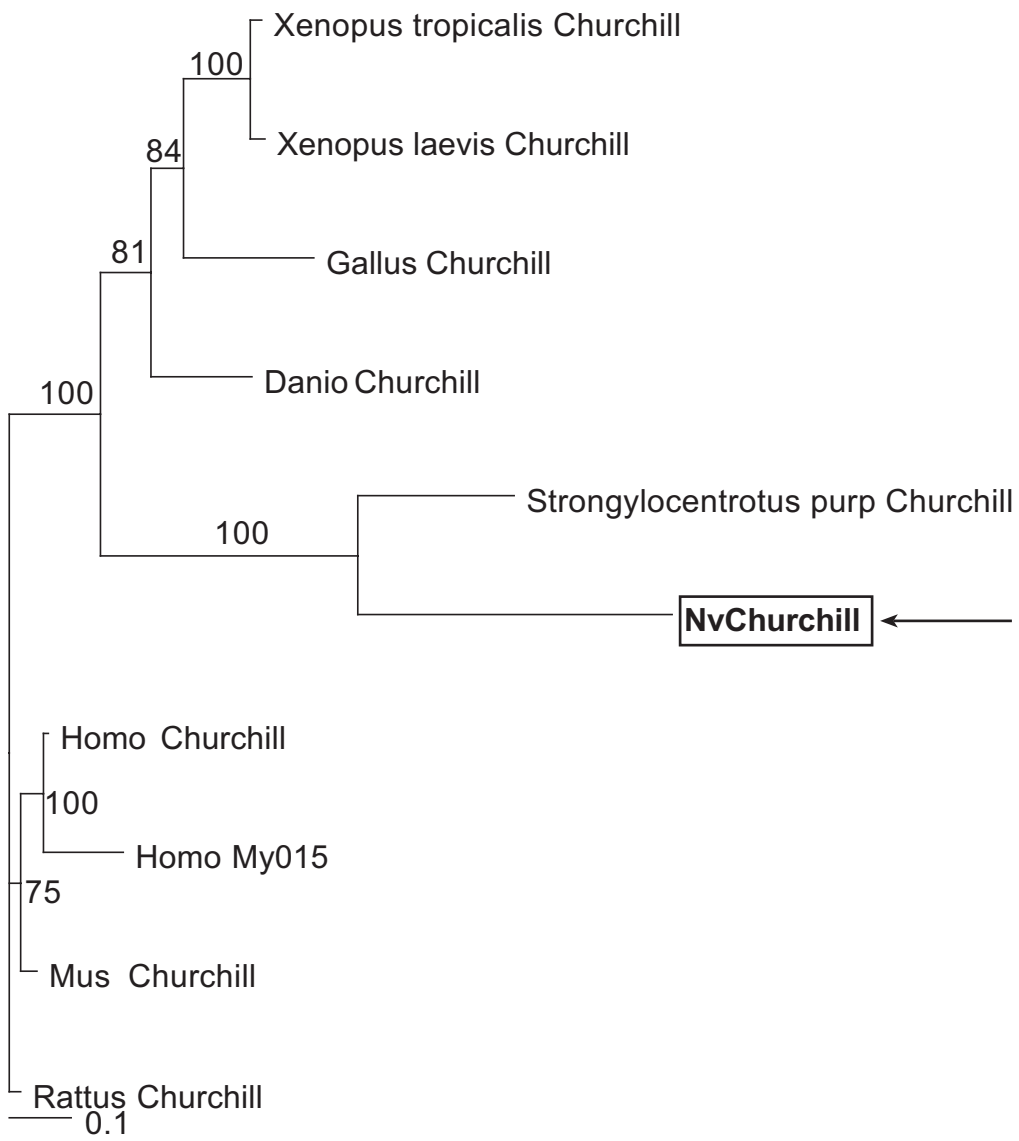

Supplement: NIHMS41198-supplement-SFig4.pdf [file NIHMS41198-supplement-SFig4.pdf]

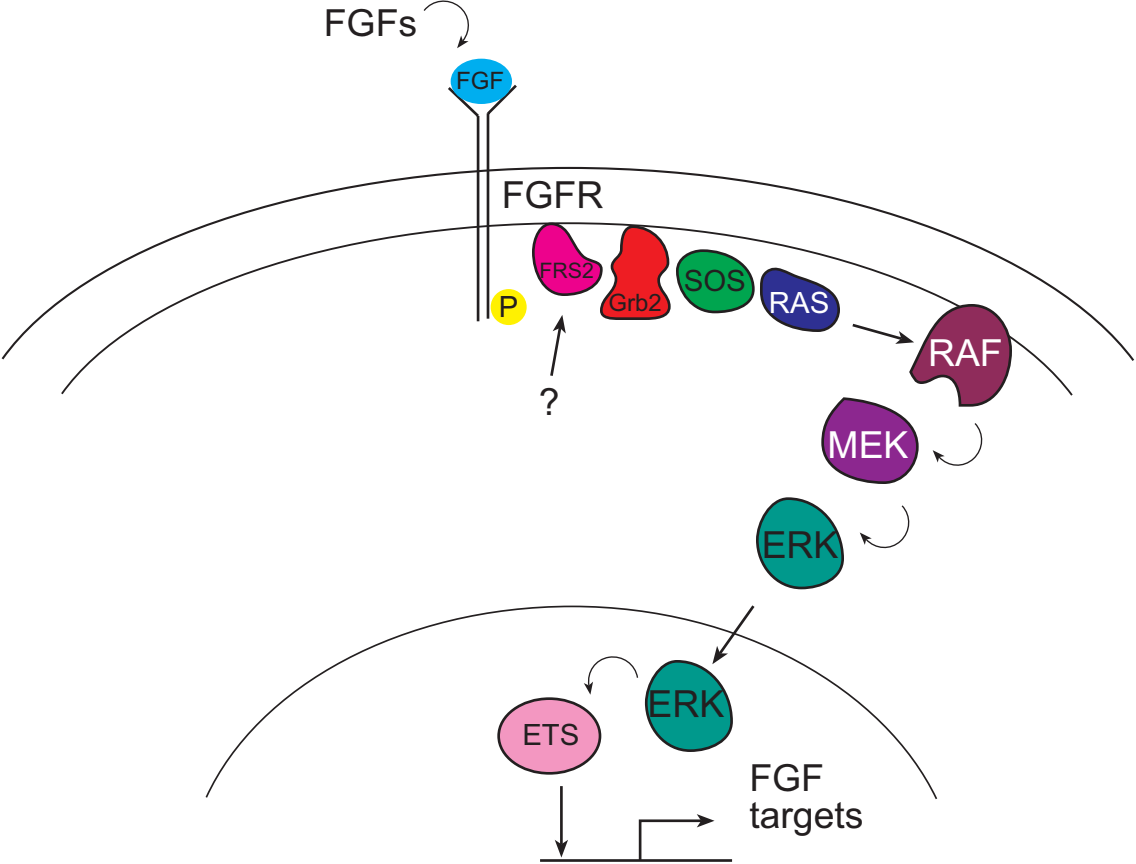

Supplement: NIHMS41198-supplement-SFig6.pdf [file NIHMS41198-supplement-SFig6.pdf]
